# Supplementary material for: Terpyridine–Cu(ii) targeting human telomeric DNA to produce highly stereospecific G-quadruplex DNA metalloenzyme
Source: PubMed Central journal article supplement (PMC5949855; doi:10.1039/c5sc01381j), 2015-06-24
Supplement: SC-006-C5SC01381J-s001.pdf [file SC-006-C5SC01381J-s001.pdf]

## *Supplementary Information*

### Terpyridine-Cu(II) Targeting Human Telomeric DNA to Produce Highly Stereospecific G-quadruplex DNA Metalloenzyme

Yinghao Li,<sup>ab</sup> Mingpan Cheng,<sup>ab</sup> Jingya Hao,<sup>ab</sup> Changhao Wang,<sup>a</sup> Guoqing Jia<sup>\*a</sup> and Can Li<sup>\*a</sup>

<sup>a</sup>State Key Laboratory of Catalysis, Dalian Institute of Chemical Physics, Chinese Academy of Sciences, Dalian 116023, China.

<sup>b</sup>University of Chinese Academy of Sciences, No.19A Yuquan Road, Beijing, 100049, China.

\*E-mail: canli@dicp.ac.cn; ggjia@dicp.ac.cn.

# Content

|                                                                                  |    |
|----------------------------------------------------------------------------------|----|
| Supplementary Results .....                                                      | 3  |
| Supplementary Methods .....                                                      | 12 |
| General Methods.....                                                             | 12 |
| Supplementary Methods Note 1: Synthesis of substrates and racemic products ..... | 15 |
| Supplementary Methods Note 2: Synthesis of ligands and metal complexes .....     | 15 |
| Supplementary Methods Note 3: General catalytic procedure .....                  | 19 |
| Supplementary Methods Note 4: HPLC analysis condition .....                      | 20 |
| Supplementary Methods Note 5: Calculation the conversion of <b>1a</b> .....      | 20 |
| Supplementary Methods Note 6: Kinetic measurements .....                         | 21 |
| <sup>1</sup> H and <sup>13</sup> C NMR Spectra of Products .....                 | 22 |
| HPLC Traces of Products.....                                                     | 37 |
| References.....                                                                  | 60 |

## Supplementary Results

**Fig. S1** Catalytic activity of HT G4-DNA metalloenzymes for the Diels-Alder reaction of **1a** and **2** at pH 6.5. Smooth curve shows the fit to the Michaelis–Menten equation.

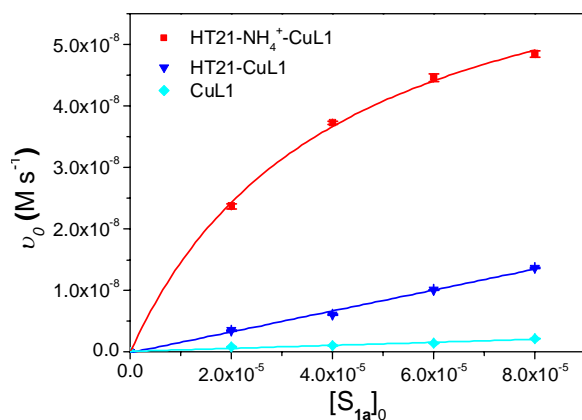

| Entry | Catalyst                                | $k_{\text{cat}}/K_{\text{M}}$<br>( $\text{M}^{-1} \text{s}^{-1}$ ) <sup>a</sup> | $K_{\text{M}}$<br>( $\mu\text{M}$ ) <sup>a</sup> | $k_{\text{cat}} \times 10^3$<br>( $\text{s}^{-1}$ ) <sup>a</sup> | Rate acceleration<br>(the ratio of $k_{\text{cat}}/K_{\text{M}}$ ) |
|-------|-----------------------------------------|---------------------------------------------------------------------------------|--------------------------------------------------|------------------------------------------------------------------|--------------------------------------------------------------------|
| 1     | CuL1                                    | $0.49 \pm 0.06$                                                                 | N.D.                                             | N.D.                                                             | <b>1</b>                                                           |
| 2     | HT21-CuL1                               | $3.4 \pm 0.1$                                                                   | N.D.                                             | N.D.                                                             | <b>~6.9</b>                                                        |
| 3     | HT21-NH <sub>4</sub> <sup>+</sup> -CuL1 | $36 \pm 4$                                                                      | $41 \pm 3$                                       | $1.5 \pm 0.1$                                                    | <b>~73</b>                                                         |

<sup>a</sup> Enzymatic kinetic parameters ( $k_{\text{cat}}$  and  $K_{\text{M}}$ ) were obtained by fitting the kinetic data to the Michaelis–Menten equation ( $v_0 = k_{\text{cat}}[\text{E}_{\text{catalyst}}]_0[\text{S}_{1\text{a}}]_0 / (K_{\text{M}} + [\text{S}_{1\text{a}}]_0)$ ).  $k_{\text{cat}}/K_{\text{M}}$  values were obtained by fitting the linear portion of the Michaelis–Menten plot to  $v_0 = (k_{\text{cat}}/K_{\text{M}})[\text{E}_{\text{catalyst}}]_0[\text{S}_{1\text{a}}]_0$ . N.D., not determined.

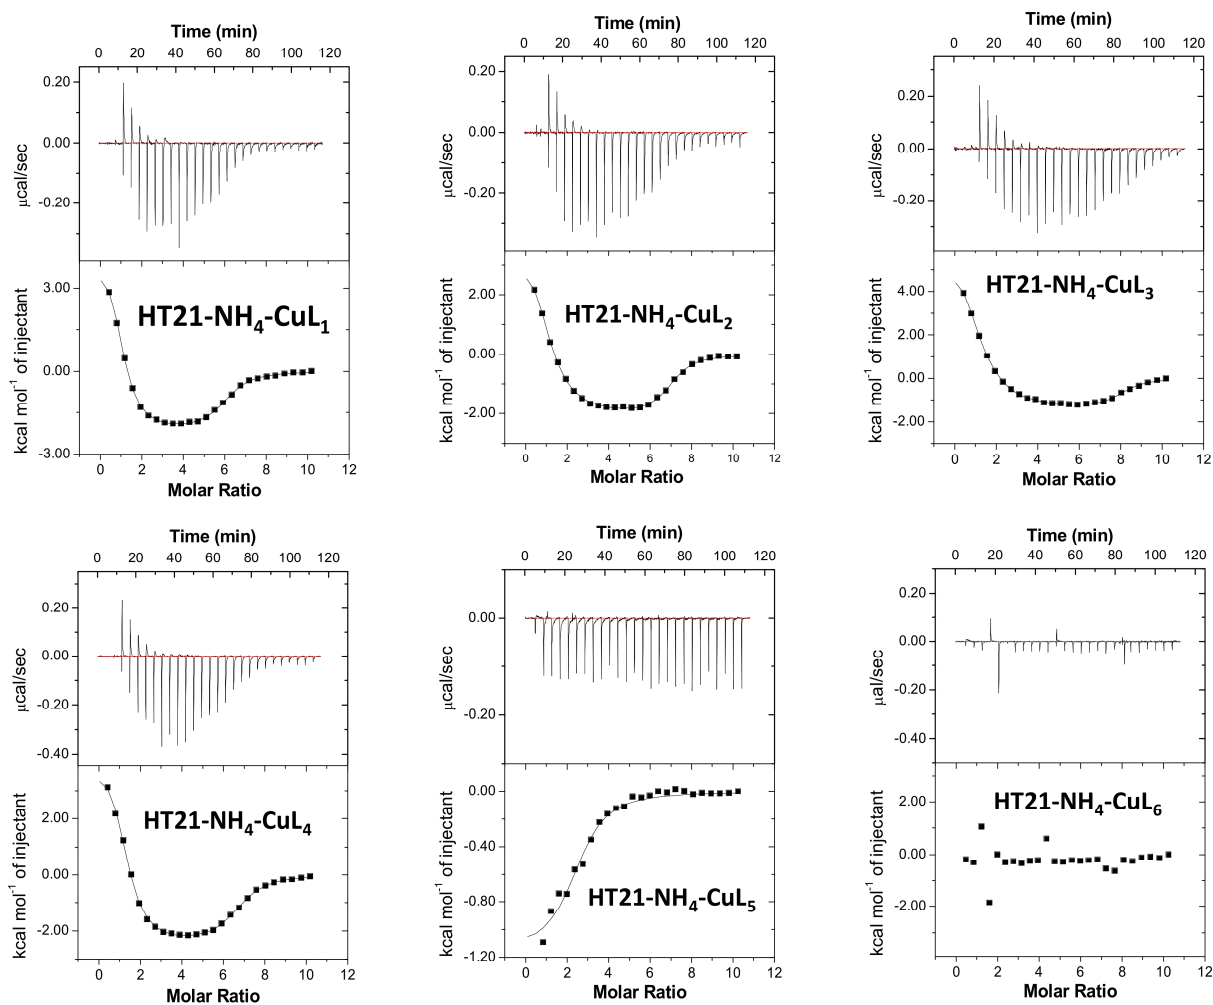

**Fig. S2** Isothermal titration calorimetry (ITC) profile of different cofactors (CuL<sub>n</sub>) binding to human telomeric G-quadruplex DNA (HT21) in 30 mM NH<sub>4</sub>Cl at 298K. Data were fitted to “two-event” (CuL<sub>1</sub>-L<sub>4</sub>) or “one-event” (CuL<sub>5</sub>) binding model using Origin 8.0 software.

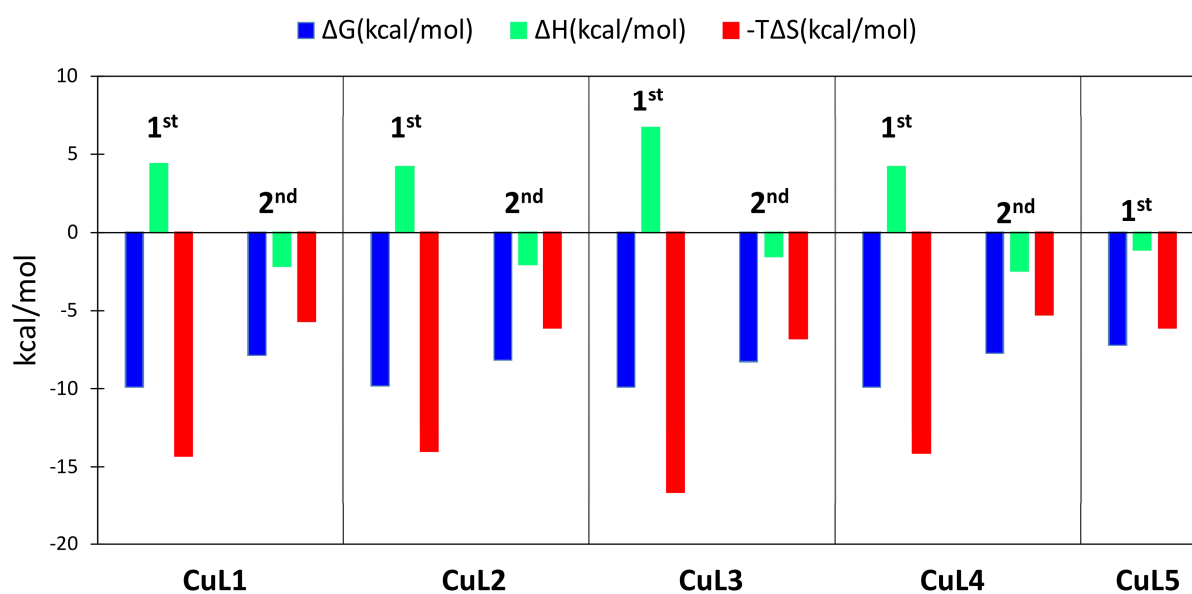

**Fig. S3** Comparison of the thermodynamic signature of different cofactors (CuL<sub>n</sub>) binding to human telomeric G-quadruplex DNA (HT21) in 30 mM NH<sub>4</sub>Cl at 298K.

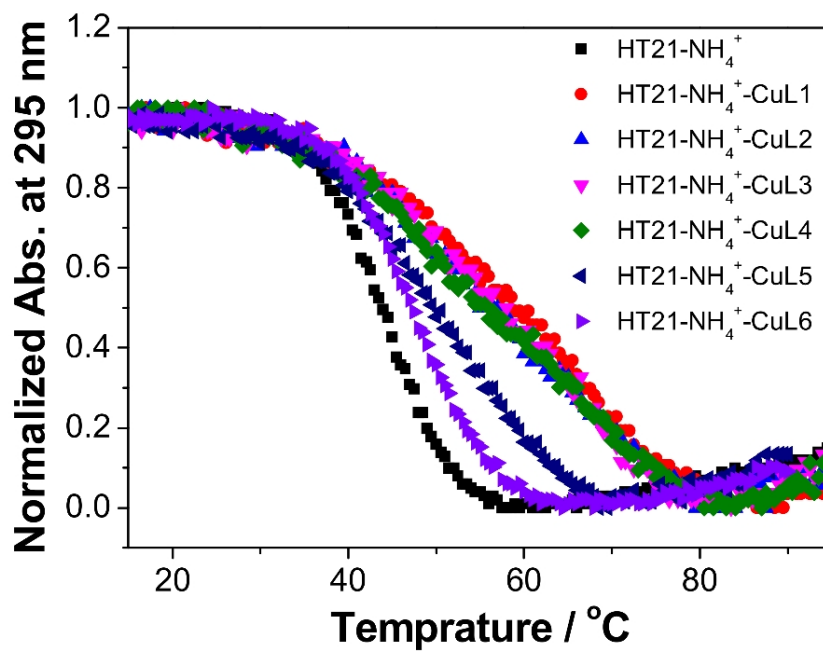

**Fig. S4** Normalized melting curves of HT G4-DNA metalloenzymes with different terpyridine-Cu(II) cofactors as compared with HT21 itself in NH<sub>4</sub><sup>+</sup> media monitored by UV absorption at 295 nm (DNA strand concentration, 5  $\mu$ M; NH<sub>4</sub>Cl, 30 mM; CuLn, 10  $\mu$ M; MOPS buffer, 20 mM, pH 6.5).

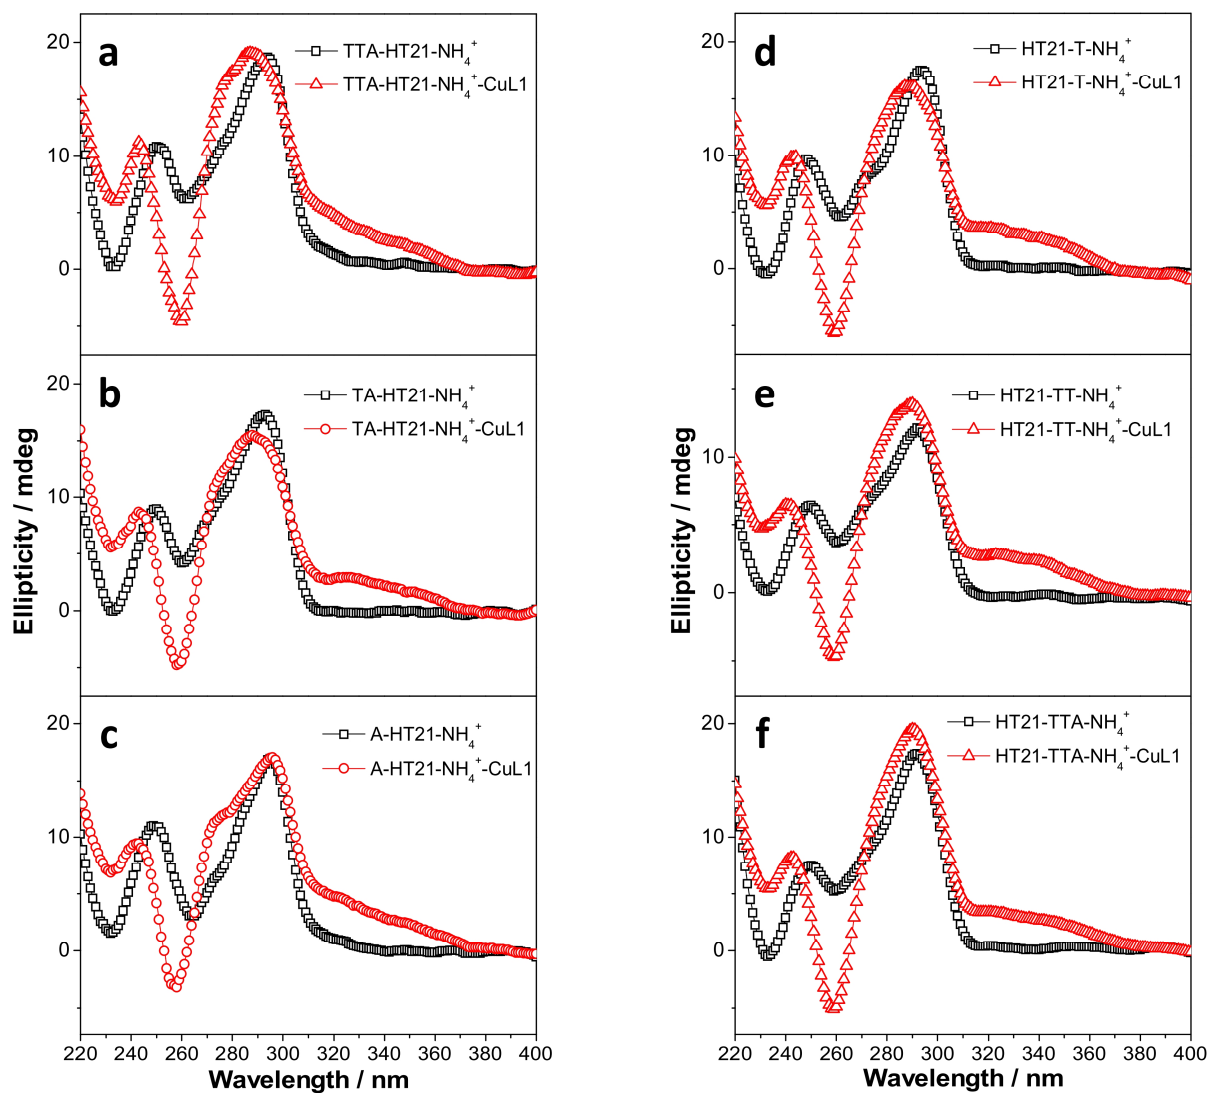

**Fig. S5** CD spectra of derivative HT G4-DNA metalloenzymes with flanking bases at 5'-end (a-c) or 3'-end (d-f) (DNA strand concentration, 5  $\mu$ M;  $\text{NH}_4\text{Cl}$ , 30 mM; CuL1, 10  $\mu$ M; MOPS buffer, 20 mM, pH 6.5).

The stability of HT21-NH<sub>4</sub><sup>+</sup>-CuL1 is evaluated by recycling experiment (Fig. S6). After every reaction, the products were extracted with ether and fresh substrates were added into the aqueous phase containing HT21-NH<sub>4</sub><sup>+</sup>-CuL1 catalyst. The results of recycling show that there are some degree of decrease in catalytic activity and enantioselectivity for G-quadruplex DNA metalloenzyme (Fig. S6a). This might be due to the structural change of G-quadruplex DNA metalloenzyme as indicated in CD spectra (Fig. S6b).

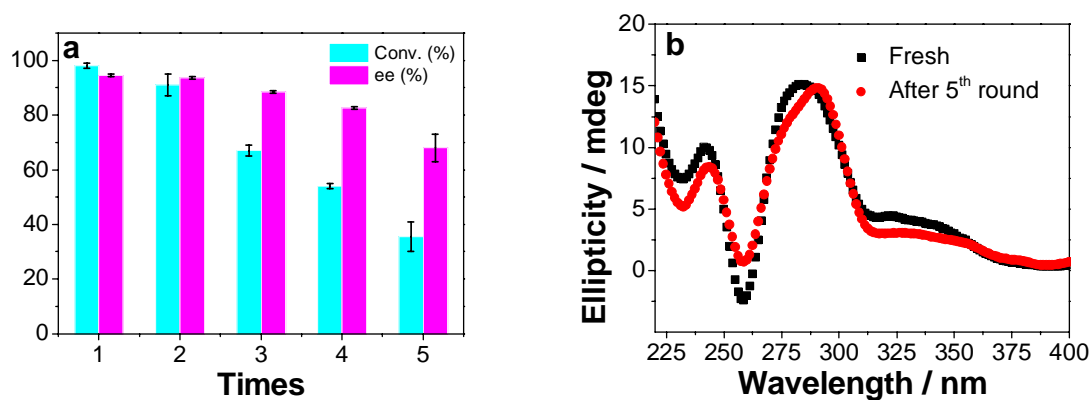

**Fig. S6** Recycling experiments for evaluating the stability of HT21-NH<sub>4</sub><sup>+</sup>-CuL1. (a) Catalytic results. (b) CD spectra of HT21-NH<sub>4</sub><sup>+</sup>-CuL1 when fresh preparing or after 5<sup>th</sup> round catalysis.



We have used 2 equivalents of CuL1 compared to HT21 because the maximum enantiomeric excess (ee) can be obtained there.

As shown in Fig. S7a, the plot of the initial rate ( $v_0$ ) as a function of [CuL1]:[HT21] shows that the activity increases dramatically until a molar ratio of 1:1 is reached, after which no significant increase can be observed. This indicates that a high active site has been formed at a molar ratio of 1:1.

However, a moderate enantioselectivity together with a big error bar is observed for the molar ratio of 1:1 (Fig. S7b). Until the ratio of [CuL1]:[HT21] increases to 2, the enantioselectivity reaches the maximum with negligible error bar. CD spectroscopic study further indicates that there is a great structural change of HT21 upon addition of 1 equivalent of CuL1 (Fig. S7c). Subsequently, a relatively stable structure is formed beginning with the molar ratio of 2. In combination with enantioselectivity and CD data, we deduce that the stable HT21 G-quadruplex DNA stabilized by 2 or more CuL1 is necessary for a highly specific enantioselectivity. In addition, ITC data tell us there are two binding events of CuL1 within HT21 G-quadruplex DNA, one is high-affinity and the other is low-affinity (Table 3). Therefore, we think that the first CuL1 with high-affinity is main active site and the second CuL1 with low-affinity mainly plays a structural role in constructing and stabilizing a catalytic 3D structure.

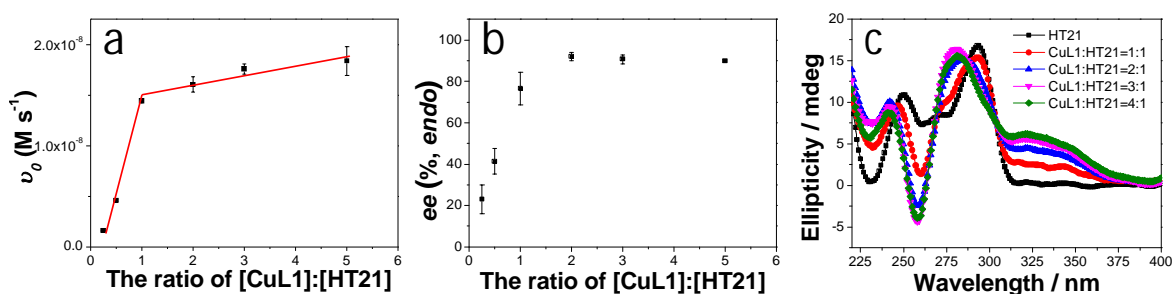

**Fig. S7** Functional characterization of the catalysts. Plot of the initial rate ( $v_0$ ) (a) and enantioselectivity (b) of model Diels-Alder reaction as a function of [CuL1]:[HT21] catalyzed by HT21-NH<sub>4</sub><sup>+</sup>-CuL1. (c) CD spectra of different ratio of [CuL1]:[HT21] in 30 mM NH<sub>4</sub><sup>+</sup>.

**Table S1** Binding thermodynamic parameters of molecular recognition between terpyridine-Cu(II) complex (CuL1) and human telomeric DNA sequence (HT21) at 298K<sup>a</sup>

| Binding events  | $K_a$ ( $M^{-1}$ ) | n   | $\Delta H^b$ | $-T\Delta S^b$ | $\Delta G^b$ |
|-----------------|--------------------|-----|--------------|----------------|--------------|
| 1 <sup>st</sup> | (1.5±0.6)E8        | 1.0 | -19.1±3.1    | 7.9            | -11.2        |
| 2 <sup>nd</sup> | (3.2±0.9)E6        | 5   | -4.7±0.3     | -4.2           | -8.9         |
| 3 <sup>rd</sup> | (3.3±1.5)E7        | 2   | 6.2±1.5      | -16.3          | -10.1        |

<sup>a</sup> The data were obtained by the three sets of sites model.

<sup>b</sup> Units are kcal•mol<sup>-1</sup>.

Table S2 Control experiments

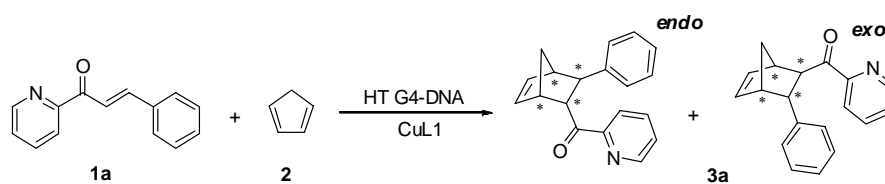

| Entry | Catalyst                                            | Conv.(%) <sup>a</sup> | endo/exo <sup>b</sup> | ee (% , endo) <sup>b</sup> |
|-------|-----------------------------------------------------|-----------------------|-----------------------|----------------------------|
| 1     | No                                                  | 35                    | 69/31                 | 0                          |
| 2     | HT21-NH <sub>4</sub> <sup>+</sup>                   | 46                    | 70/30                 | 17                         |
| 3     | HT21-NH <sub>4</sub> <sup>+</sup> -L1               | 32                    | 66/34                 | 0                          |
| 4     | HT21-NH <sub>4</sub> <sup>+</sup> -Cu <sup>2+</sup> | >99                   | 98/2                  | 68                         |

<sup>a</sup> Determined for the crude product by HPLC analysis on a chiral stationary phase (**Supplementary Methods Note 5**), Reproducible within  $\pm 5\%$ . <sup>b</sup> Determined by chiral-phase HPLC. Reproducible within  $\pm 2\%$ . Reaction conditions: **1a** (1 mM), **2** (10  $\mu\text{L}$ , 260 mM), human telomeric G-quadruplex DNA (50  $\mu\text{M}$ ), **L1** (100  $\mu\text{M}$ ) or  $\text{Cu}(\text{NO}_3)_2$  (100  $\mu\text{M}$ ),  $\text{NH}_4\text{Cl}$  (30 mM), MOPS buffer (20 mM, pH 6.5), 4  $^\circ\text{C}$ , 24h.

## Supplementary Methods

### General Methods

**Materials:** The 21-base human telomeric sequence 5'-d(GGGTTAGGGTTAGGGTTAGGG)-3' (HT21) and its flanking base variants (see details in Table 1) were purchased from Sangon (Shanghai, China). Unnatural L-DNA was obtained from Takara (Dalian, China). The DNA strand concentrations were determined by measuring the UV absorbance of sample at 260 nm by using the molar extinction coefficient values provided by the manufacturer.  $\text{Cu}(\text{NO}_3)_2 \cdot 3\text{H}_2\text{O}$  (>99.5%), NaCl (>99.5%), KCl (>99.5%),  $\text{NH}_4\text{Cl}$  (>99.5%) were purchased from the Shanghai Chemical Reagent Company of the Chinese Medicine Group. 3-(N-morpholino)propanesulfonic acid (MOPS) were purchased from Sangon (Shanghai, China). Water purified on a Milli-Q A10 water purification system (specific resistance of 18.2 M $\Omega$  at 25 °C) was used for all experiments. All experiments were carried out in 20 mM MOPS buffer (pH 6.5) unless otherwise stated. Ligands (L1-L4) and metal complexes  $\text{CuL}_n$  (L1-L6) were synthesized as described in Supporting Information (see Supplementary Methods Note 2). L5 and L6 were obtained from commercial sources and used without further purification. Dienophiles **1a-f**, **4a-e** and their corresponding racemic products were prepared according to the literature (see **Supplementary Methods Note 1**).

**UV Melting Experiment.** UV melting experiments were carried out on a Shimadzu 2450 spectrophotometer (Shimadzu, Japan) equipped with a Peltier temperature control accessory. A sealed quartz cell with a path length of 1.0 cm was used. The UV melting curves of the human telomeric G-quadruplexes (5  $\mu\text{M}$ ) and their metalloenzymes were monitored by UV absorption at 295 nm with a heating rate of 0.5 °C/min. Data were analyzed by using Origin 8 software. The

melting temperatures ( $T_m$ ) can be obtained from the best sigmoidal curve fit of the melting profile.

**Circular Dichroism (CD) Spectroscopy.** All CD spectra were recorded on a dual beam DSM 1000 CD spectrophotometer (Olis, Bogart, GA) with a 10 mm path-length quartz cell. Each measurement was recorded from 220 to 400 nm at 20 °C under  $N_2$  purge. The scan rate was 0.5 nm per second. The average scan for each sample was subtracted by a background CD spectrum of corresponding buffer solution. CD samples of all G-quadruplexes were prepared at a concentration (G-quadruplex unit) of 5  $\mu M$  by using a MOPS buffer (20 mM, pH 6.5) containing corresponding salts (50 mM NaCl or 150 mM KCl or 30 mM  $NH_4Cl$ ). When binding with  $CuLn$  complexes (10  $\mu M$ ), the CD spectra of corresponding human telomeric G-quadruplex DNA metalloenzymes were recorded then.

**High Performance Liquid Chromatography (HPLC).** The enantioselectivity was determined by Agilent HPLC 1260 analysis using Daicel chiralcel OD, ODH, OJH or chiralpak AD, ADH column with a UV-detector by using isopropanol and n-hexane as eluents at 25 °C.

**$^1H$  and  $^{13}C$  NMR Spectroscopy.** All  $^1H$  and  $^{13}C$  NMR spectra were recorded on a Bruker-400 MHz NMR instrument in  $CDCl_3$  using TMS or residual protic solvent signals as internal standard. Data for  $^1H$  NMR are recorded as follows: chemical shift ( $\delta$ , ppm), multiplicity (s = singlet, d = doublet, t = triplet, q = quartet, m = multiplet or unresolved, coupling constant(s) in Hz, integration).

**Isothermal Titration Calorimetry (ITC).** ITC measurements were carried out at 25 °C using a MicroCal<sup>TM</sup> ITC<sub>200</sub> titration calorimeter (MicroCal, GE). Experiments were performed in MOPS buffer (20 mM, pH 6.5) containing  $NH_4Cl$  (30 mM). The reference cell in the ITC was filled with ultrapure water (18.2  $M\Omega\ cm^{-1}$  resistivity). A pre-folded human telomeric G-quadruplex

DNA (20  $\mu\text{M}$ ) in  $\text{NH}_4\text{Cl}$  was loaded into the calorimeter cell. Then the syringe was loaded with  $\text{CuLn}$  complex (1 mM) in corresponding buffers. Following the auto-equilibration and an initial 500 s delay, the  $\text{CuLn}$  titrant divided into 25 injections (1.5  $\mu\text{L}$  each) was added into the cell with 250 s injection intervals. The stir rate was 1000 rpm. All data were recorded with the GE Instruments software provided. Control experiments were conducted by titrating MOPS buffer into human telomeric G-quadruplex DNA and titrating  $\text{CuLn}$  into MOPS buffer under identical experimental condition to correct binding isotherm for background heat effects. Calorimetric data were further analyzed according to relevant model using MicroCal ORIGIN software and MATLAB. Data analysis gives  $\Delta\text{H}$  (binding enthalpy change, kcal/mol),  $K_a$  (binding constant,  $\text{M}^{-1}$ ), and  $n$  (number of bound  $\text{CuLn}$  cofactor) whereas the change in Gibbs energy and the entropic contribution were determined by the relationships  $\Delta\text{G} = -RT \ln K_a$  and  $\Delta\text{G} = \Delta\text{H} - T\Delta\text{S}$ , respectively.

### Supplementary Methods Note 1: Synthesis of substrates and racemic products

Dienophiles **1a-f**, **4a-e** and their corresponding racemic products were synthesized according to the literature.<sup>1-5</sup>

### Supplementary Methods Note 2: Synthesis of ligands and metal complexes

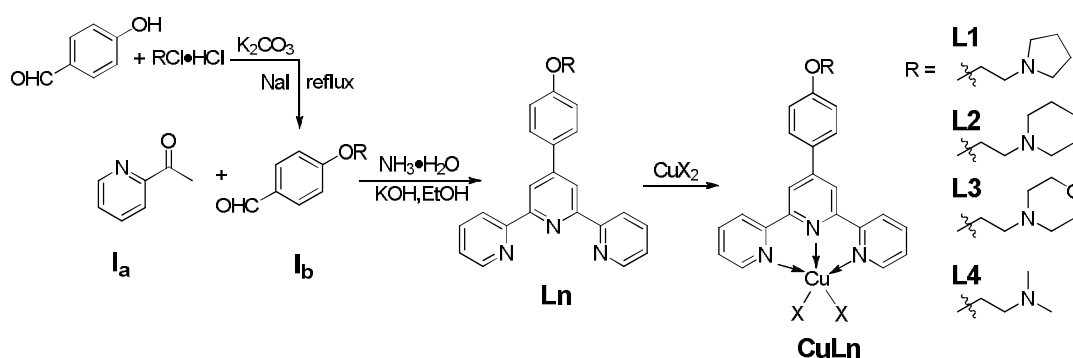

#### a) Synthesis of ligands (L1-L4).<sup>6</sup>

**4'-substituted benzaldehyde (I<sub>b</sub>):** 4-hydroxybenzaldehyde (2.2 g, 18 mmol) and corresponding chloride hydrochloride (27 mmol) were dissolved in 100 mL of dried-acetone. Then, anhydrous potassium carbonate (4.97 g, 36 mmol) and sodium iodide (0.68 g, 4.5 mmol) was added to the flask. The reaction was refluxed under dried  $\text{N}_2$  for about 24 hs. The flask was cooled to RT. The suspension is filtered, and the filtrate was concentrated *in vacuo*. The obtained solid was redissolved in EtOAc. The organic layer was washed with brine, and dried with  $\text{Na}_2\text{SO}_4$ . The drying agent was removed by filtration and the filtrate was concentrated and dried *in vacuo* to give a thick and pale yellow oil. The unpurified oil was used without further purification.

**4'-substituted-2,2':6',2''-terpyridine (Ln):** 2.61 mL of 2-acetylpyridine (2.813 g, 23.2 mmol, 2 equiv) was added to a solution of 4'-substituted benzaldehyde (11.6 mmol, 1 equiv) in 50 mL of ethanol. Then, KOH pellets (2.6 g, 85%, 46.5 mmol, 4 equiv) were added to this solution. The reaction was stirred at RT for 10 min. Subsequently, 40 mL of 25% aq. NH<sub>3</sub> was added to the flask drop-wise. After 24 h of stirring at 34 °C, 5 mL of 25% aq. NH<sub>3</sub> was added to the reaction mixture again. The flask was cooled to -20 °C and then the obtained white precipitate is filtered and washed with cool ethanol. We further purified the ligand by a subsequent recrystallization from ethanol-H<sub>2</sub>O. The ligand was recovered by filtration, washed with cold ethanol and petroleum ether, and dried under high vacuum for 24 h.

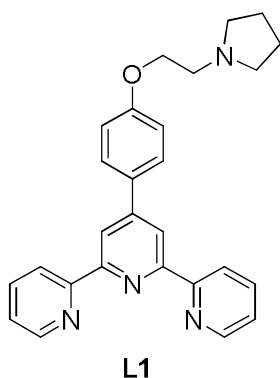

**4'-(4-(2-(pyrrolidin-1-yl)ethoxy)phenyl)-2,2':6',2''-terpyridine L1**

White flaky crystal. <sup>1</sup>H NMR (400 MHz, CDCl<sub>3</sub>): δ (ppm) 8.75 – 8.69 (m, 4H), 8.66 (d, *J* = 8.0 Hz, 2H), 7.91 – 7.80 (m, 4H), 7.37 – 7.28 (m, 2H), 7.04 (d, *J* = 8.7 Hz, 2H), 4.18 (t, *J* = 5.9 Hz, 2H), 2.93 (t, *J* = 5.9 Hz, 2H), 2.70 – 2.57 (m, 4H), 1.89 – 1.74 (m, 4H). <sup>13</sup>C NMR (101 MHz, CDCl<sub>3</sub>): δ (ppm) 160.0, 156.5, 156.0, 149.9, 149.2, 136.9, 130.9, 128.6, 123.8, 121.5, 118.4, 115.1, 67.4, 55.2, 54.9, 23.7.

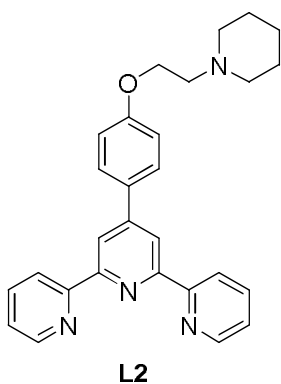

**4'-(4-(2-(piperidin-1-yl)ethoxy)phenyl)-2,2':6',2''-terpyridine (L2)**

White flaky crystal. <sup>1</sup>H NMR (400 MHz, CDCl<sub>3</sub>): δ (ppm) 8.76 – 8.68 (m, 4H), 8.66 (d, *J* = 8.0 Hz, 2H), 7.91 – 7.81 (m, 4H), 7.37 – 7.29 (m, 2H), 7.03 (d, *J* = 8.7 Hz, 2H), 4.17 (t, *J* = 6.1 Hz, 2H), 2.80 (t, *J* = 6.1 Hz, 2H), 2.53 (t, 4H), 1.69 – 1.55 (m, 4H), 1.51 – 1.40 (m, 2H). <sup>13</sup>C NMR (101 MHz, CDCl<sub>3</sub>): δ (ppm) 159.9, 156.5, 155.9, 149.8, 149.2, 136.9, 130.8, 128.6, 123.8, 121.5, 118.4, 115.1, 66.3, 58.1, 55.2, 26.1, 24.3.



**4-(2-(4-([2,2':6',2'']-terpyridin]-4'-yl)phenoxy)ethyl)morpholine**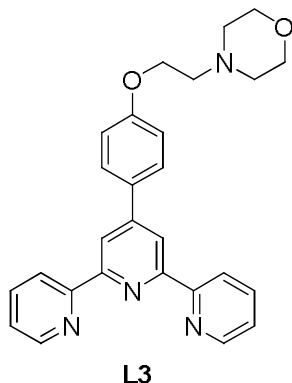**(L3)**

White needle-shaped crystal.  $^1\text{H NMR}$  (400 MHz,  $\text{CDCl}_3$ ):  $\delta$  (ppm) 8.75 – 8.69 (m, 4H), 8.66 (d,  $J = 7.9$  Hz, 2H), 7.91 – 7.81 (m, 4H), 7.37 – 7.30 (m, 2H), 7.03 (d,  $J = 8.7$  Hz, 2H), 4.17 (t,  $J = 5.7$  Hz, 2H), 3.78 – 3.72 (m, 4H), 2.83 (t,  $J = 5.7$  Hz, 2H), 2.64 – 2.55 (m, 4H).  $^{13}\text{C NMR}$  (101 MHz,  $\text{CDCl}_3$ ):  $\delta$  (ppm) 159.8, 156.5, 156.0, 149.8, 149.2, 137.0, 131.0, 128.6, 123.9, 121.5, 118.4, 115.1, 67.1, 66.1, 57.8, 54.3.

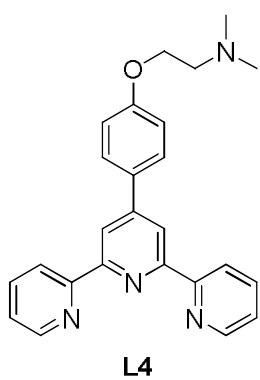**2-(4-([2,2':6',2'']-terpyridin]-4'-yl)phenoxy)-N,N-dimethylethanamine (L4)**

White needle-shaped crystal.  $^1\text{H NMR}$  (400 MHz,  $\text{CDCl}_3$ ):  $\delta$  (ppm) 8.75 – 8.69 (m, 4H), 8.65 (d,  $J = 8.0$  Hz, 2H), 7.91 – 7.81 (m, 4H), 7.36 – 7.29 (m, 2H), 7.04 (d,  $J = 8.6$  Hz, 2H), 4.13 (td,  $J = 5.7, 0.8$  Hz, 2H), 2.76 (t,  $J = 5.5$  Hz, 2H), 2.36 (s, 6H).  $^{13}\text{C NMR}$  (101 MHz,  $\text{CDCl}_3$ ):  $\delta$  (ppm) 160.0, 156.6, 156.0, 149.9, 149.2, 137.0, 131.0, 128.6, 123.9, 121.5, 118.4, 115.1, 66.3, 58.5, 46.1.

**b) Synthesis of metal complex  $\text{CuLn}$  ( $n = 1\sim 6$ ).**<sup>7</sup>

4.8 mL of  $\text{Cu}(\text{NO}_3)_2 \cdot 3\text{H}_2\text{O}$  (48.3 mg, 0.2 mmol, 1.0 equiv.) in anhydrous acetonitrile is added to a solution of 4'-substituted-2,2':6',2'']-terpyridine (0.2 mmol, 1.0 equiv.) in 4.8 mL of anhydrous DCM and the solution is put in the fridge for 3-4 days. The obtained precipitate is filtered, washed with cool ethanol and dried under high vacuum for 24 h.

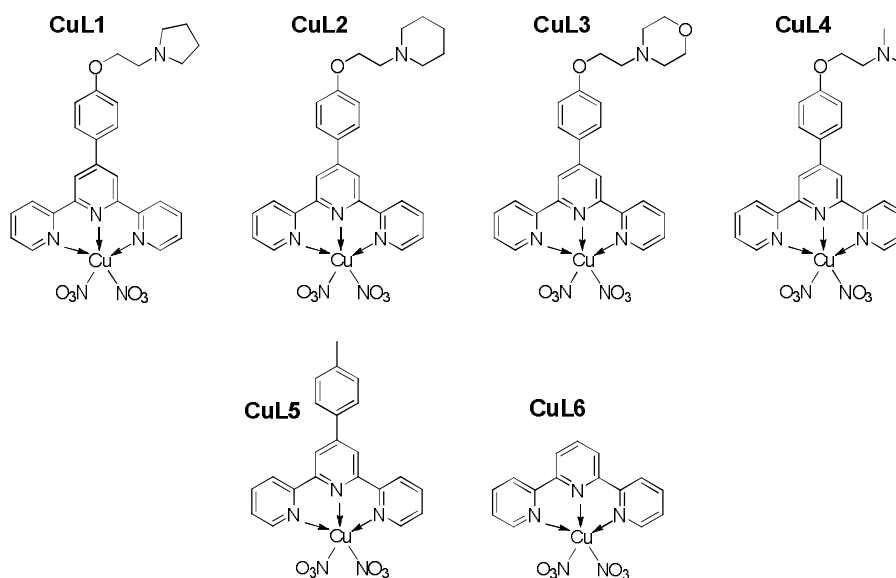

**CuL1** is obtained as green solid. **HRMS** (TOF ES<sup>+</sup>) calcd for [C<sub>27</sub>H<sub>26</sub>ClN<sub>4</sub>OCu]<sup>+</sup>: 520.1091, found: 520.1092.

**CuL2** is obtained as green solid. **HRMS** (TOF ES<sup>+</sup>) calcd for [C<sub>28</sub>H<sub>28</sub>ClN<sub>4</sub>OCu]<sup>+</sup>: 534.1248, found: 534.1254.

**CuL3** is obtained as green solid. **HRMS** (TOF ES<sup>+</sup>) calcd for [C<sub>27</sub>H<sub>26</sub>ClN<sub>4</sub>O<sub>2</sub>Cu]<sup>+</sup>: 536.1040, found: 536.1049.

**CuL4** is obtained as green solid. **HRMS** (TOF ES<sup>+</sup>) calcd for [C<sub>25</sub>H<sub>24</sub>ClN<sub>4</sub>OCu]<sup>+</sup>: 494.0935, found: 494.0938.

**CuL5** is obtained as blue crystal. **HRMS** (TOF ES<sup>+</sup>) calcd for [C<sub>22</sub>H<sub>17</sub>ClN<sub>3</sub>Cu]<sup>+</sup>: 421.0407, found: 421.0410.

**CuL6** is obtained as blue crystal. **HRMS** (TOF ES<sup>+</sup>) calcd for [C<sub>15</sub>H<sub>11</sub>ClN<sub>3</sub>OCu]<sup>+</sup>: 330.9938, found: 330.9942.

## Supplementary Methods Note 3: General catalytic procedure

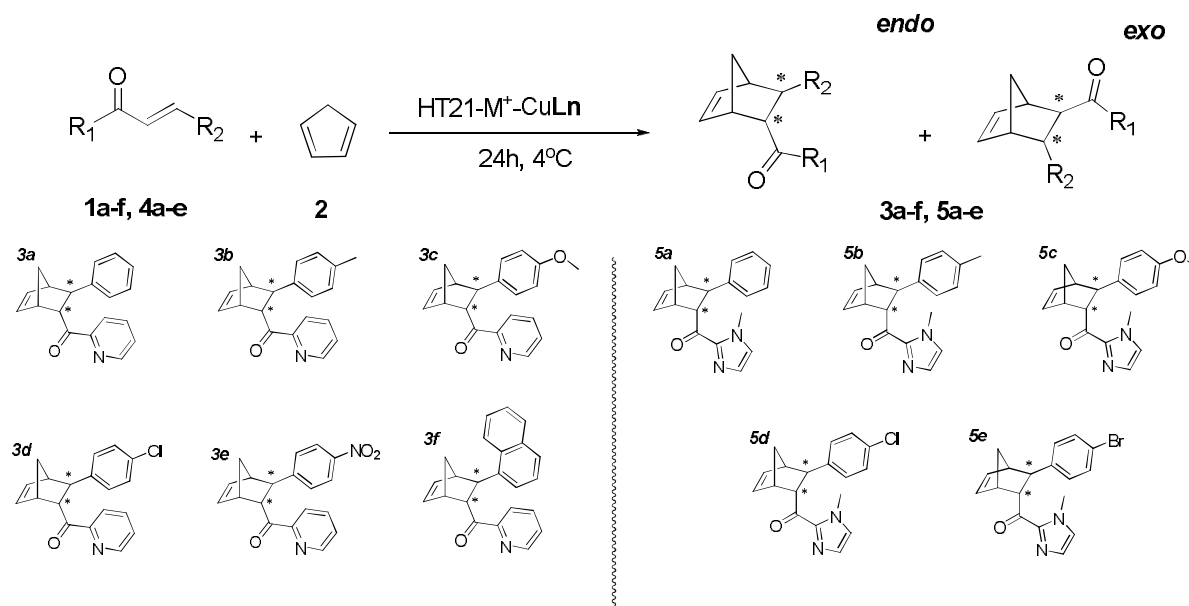

To a MOPS buffer (0.5 mL, 20 mM, pH 6.5) containing NaCl (50mM) or KCl (150 mM) or NH<sub>4</sub>Cl (30 mM), an aqueous solution of human telomeric DNA (final G-quadruplex unit conc. 50 μM) was added. After stirred for a half hour at 4 °C, a solution of Cu(Ln)(NO<sub>3</sub>)<sub>2</sub> (final conc. 100 μM) was added. Then, aza-chalcones **1** or **4** in CH<sub>3</sub>CN (5 μL of a 0.1 M solution, 1 mM) was added. The reaction was initiated by the addition of freshly distilled cyclopentadiene **2** (10 μL, 260 mM) and the mixture was stirred for 24 hours at 4 °C, followed by the extraction with diethyl ether (3 × 5 mL), and the solvent was removed under reduced pressure. After a short flash chromatography, the residue was directly analyzed by <sup>1</sup>H-NMR and HPLC. The conversions were determined by <sup>1</sup>H-NMR and HPLC (only for **3a**) of the crude product.<sup>8,9</sup> The diastereoselectivity (*endo/exo*) and enantiomeric excess (*ee*) were determined by chiral HPLC.

**Supplementary Methods Note 4: HPLC analysis condition**

Product **3a**: Daicel Chiralcel-ODH, *n*-hexane/*i*-PrOH 98:2, flow rate 0.5 mL/min,  $\lambda = 212$  nm).

Product **3b**: Daicel Chiralcel-ODH, *n*-hexane/*i*-PrOH 98:2, flow rate 0.5 mL/min,  $\lambda = 212$  nm).

Product **3c**: Daicel Chiralpak-ADH, *n*-hexane/*i*-PrOH 95:5, flow rate 1.0 mL/min,  $\lambda = 212$  nm).

Product **3d**: Daicel Chiralcel-OJH, *n*-hexane/*i*-PrOH 90:10, flow rate 0.5 mL/min,  $\lambda = 212$  nm).

Product **3e**: Daicel Chiralpak-AD, *n*-hexane/*i*-PrOH 90:10, flow rate 1.0 mL/min,  $\lambda = 254$  nm).

Product **3f**: Daicel Chiralpak-ADH, *n*-hexane/*i*-PrOH 90:10, flow rate 1.0 mL/min,  $\lambda = 254$  nm).

Product **5a**: Daicel Chiralcel-OD, *n*-hexane/*i*-PrOH 99:1, flow rate 0.5 mL/min,  $\lambda = 254$  nm).

Product **5b**: Daicel Chiralpak-ADH, *n*-hexane/*i*-PrOH 97:3, flow rate 0.5 mL/min,  $\lambda = 254$  nm).

Product **5c**: Daicel Chiralcel-OD, *n*-hexane/*i*-PrOH 98:2, flow rate 1.0 mL/min,  $\lambda = 254$  nm).

Product **5d**: Daicel Chiralpak-AD, *n*-hexane/*i*-PrOH 85:15, flow rate 1.0 mL/min,  $\lambda = 254$  nm).

Product **5e**: Daicel Chiralpak-ADH, *n*-hexane/*i*-PrOH 97:3, flow rate 1.0 mL/min,  $\lambda = 254$  nm).

**Supplementary Methods Note 5: Calculation the conversion of 1a**

The procedure to determine the conversion of **1a** by HPLC was according to the literature.<sup>8,9</sup>

Conversions of **1a** were calculated using the formula:

$$\text{Conversion (\%)} = A_{3a} / (A_{3a} + A_{1a} / f)$$

Where  $A_{1a}$  and  $A_{3a}$  are the HPLC peak areas of **1a** and **3a**, respectively. And  $f$  is the correction factor determined to be 0.73 from a calibration curve.

**Supplementary Methods Note 6: Kinetic measurements**

All kinetic measurements were performed using UV-Vis spectroscopy (Shimadzu 2450) at 293 K by monitoring the disappearance of the absorption of **1a** at 326 nm. Typical procedure is described as follows: G4-DNA (final G-quadruplex unit conc. 25  $\mu\text{M}$ ) was added to MOPS (20 mM, pH 6.5) containing  $\text{NH}_4\text{Cl}$  (30 mM) in a quartz cuvette. After stirring for 15 min, CuL1 complex (final conc. 50  $\mu\text{M}$ ) was added. After stirring for another 15 min, a series of concentration of [**1a**] equal to 20, 40, 60 and 80  $\mu\text{M}$  was added. The determination was made after **2** (final conc. 16 mM) was added with the cuvette sealed tightly. The D-A reaction was regarded as pseudo-first-order reaction as **2** is present in excess and **1a** is present at low concentrations. Enzymatic kinetic parameters ( $k_{\text{cat}}$  and  $K_{\text{M}}$ ) were obtained by fitting the data to the Michaelis–Menten equation ( $v_0 = k_{\text{cat}}[\text{E}_{\text{catalyst}}]_0[\text{S}_{\mathbf{1a}}]_0 / (K_{\text{M}} + [\text{S}_{\mathbf{1a}}]_0)$ ).  $k_{\text{cat}}/K_{\text{M}}$  values were obtained by fitting the initial linear portion of the Michaelis–Menten plot to  $v_0 = (k_{\text{cat}}/K_{\text{M}})[\text{E}_{\text{catalyst}}]_0[\text{S}_{\mathbf{1a}}]_0$ .

**<sup>1</sup>H and <sup>13</sup>C NMR Spectra of Products**

(3-phenylbicyclo[2.2.1]hept-5-en-2-yl)(pyridin-2-yl)methanone (**3a**)

<sup>1</sup>H NMR (400 MHz, CDCl<sub>3</sub>, *endo* isomer): δ 8.67 (m, 1H), 8.00 (m, 1H), 7.81 (m, 1H), 7.49 – 7.39 (m, 1H), 7.36 – 7.23 (m, 4H), 7.17 (m, 1H), 6.49 (m, 1H), 5.82 (m, 1H), 4.53 (m, 1H), 3.54 (s, 1H), 3.45 (d, *J* = 3.9 Hz, 1H), 3.09 (s, 1H), 2.07 (d, *J* = 8.4 Hz, 1H), 1.62 (m, 1H).

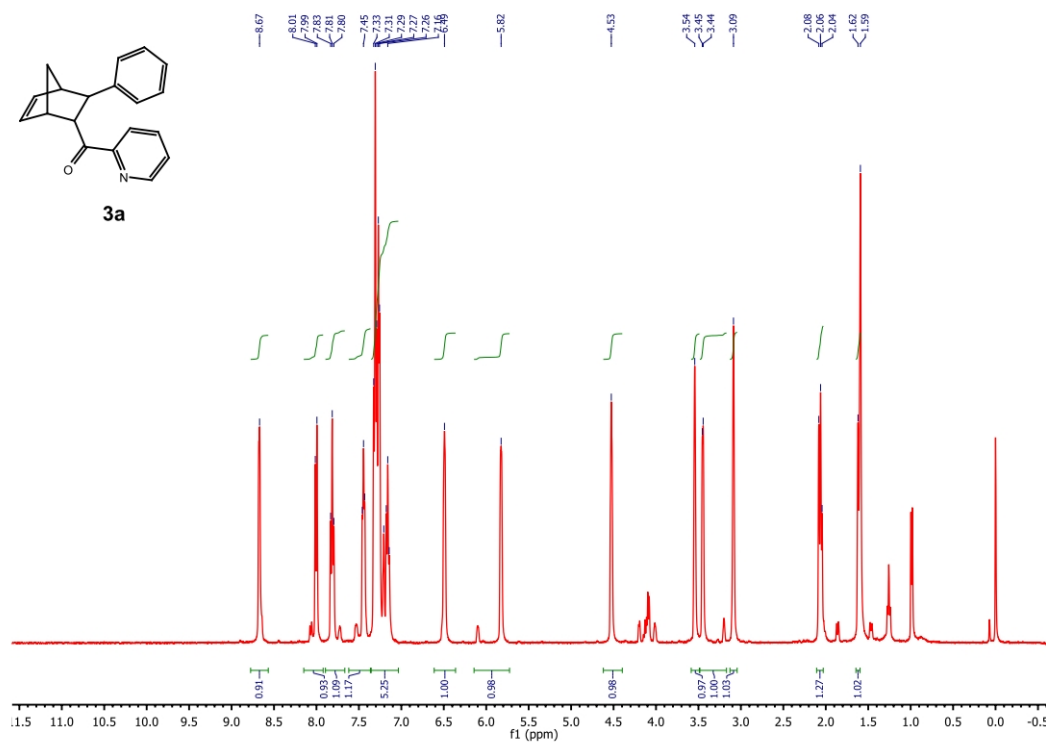

pyridin-2-yl(3-p-tolylbicyclo[2.2.1]hept-5-en-2-yl)methanone (**3b**)

$^1\text{H}$  NMR (400 MHz,  $\text{CDCl}_3$ , *endo* isomer):  $\delta$  8.67 (d,  $J = 4.6$  Hz, 1H), 8.00 (d,  $J = 7.8$  Hz, 1H), 7.81 (td,  $J = 7.7, 1.3$  Hz, 1H), 7.44 (dd,  $J = 7.0, 5.3$  Hz, 1H), 7.21 (d,  $J = 8.0$  Hz, 2H), 7.08 (d,  $J = 7.9$  Hz, 2H), 6.49 (dd,  $J = 5.4, 3.3$  Hz, 1H), 5.81 (dd,  $J = 5.6, 2.7$  Hz, 1H), 4.52 (dd,  $J = 4.9, 3.7$  Hz, 1H), 3.53 (s, 1H), 3.41 (d,  $J = 5.0$  Hz, 1H), 3.05 (s, 1H), 2.30 (s, 3H), 2.06 (d,  $J = 8.4$  Hz, 1H), 1.59 (dd,  $J = 8.5, 1.1$  Hz, 1H).

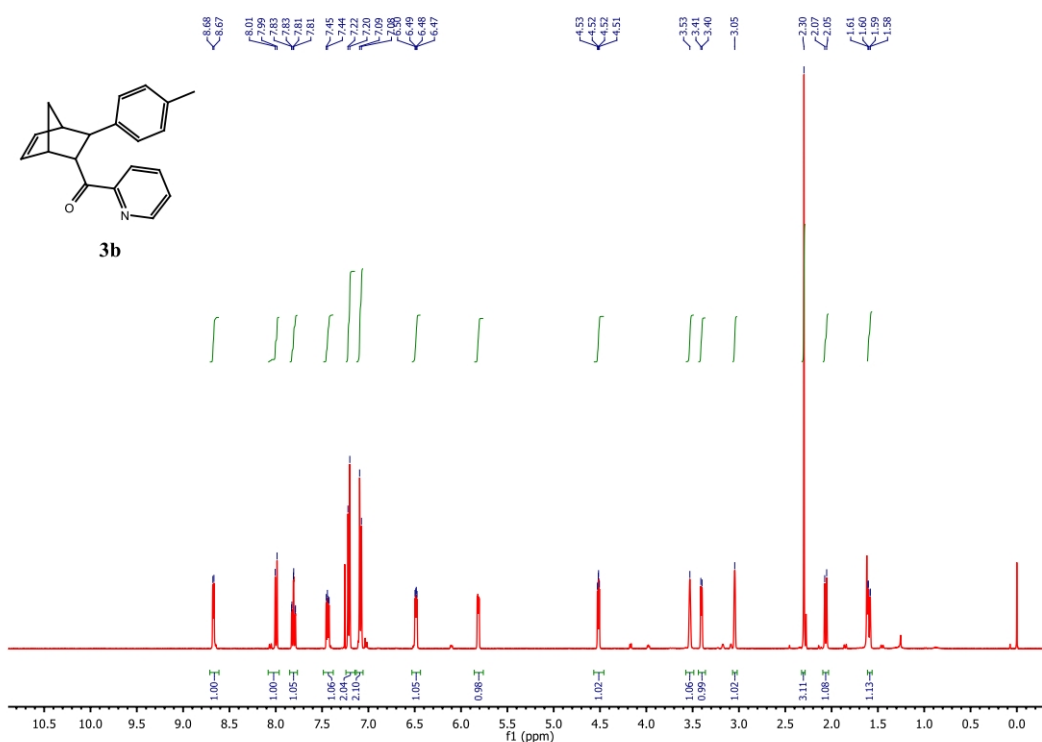

(3-(4-methoxyphenyl)bicyclo[2.2.1]hept-5-en-2-yl)(pyridin-2-yl)methanone (**3c**)

$^1\text{H}$  NMR (400 MHz,  $\text{CDCl}_3$ , *endo* isomer):  $\delta$  8.74 – 8.60 (m, 1H), 8.00 (d,  $J = 7.9$  Hz, 1H), 7.81 (td,  $J = 7.7, 1.7$  Hz, 1H), 7.44 (ddd,  $J = 7.5, 4.8, 1.1$  Hz, 1H), 7.28 – 7.18 (m, 2H), 6.86 – 6.78 (m, 2H), 6.48 (dd,  $J = 5.5, 3.2$  Hz, 1H), 5.81 (dd,  $J = 5.6, 2.7$  Hz, 1H), 4.49 (dd,  $J = 5.1, 3.5$  Hz, 1H), 3.77 (s, 3H), 3.53 (s, 1H), 3.39 (d,  $J = 4.5$  Hz, 1H), 3.02 (d,  $J = 1.2$  Hz, 1H), 2.06 (d,  $J = 8.4$  Hz, 1H), 1.60 (dd,  $J = 8.5, 1.6$  Hz, 1H).

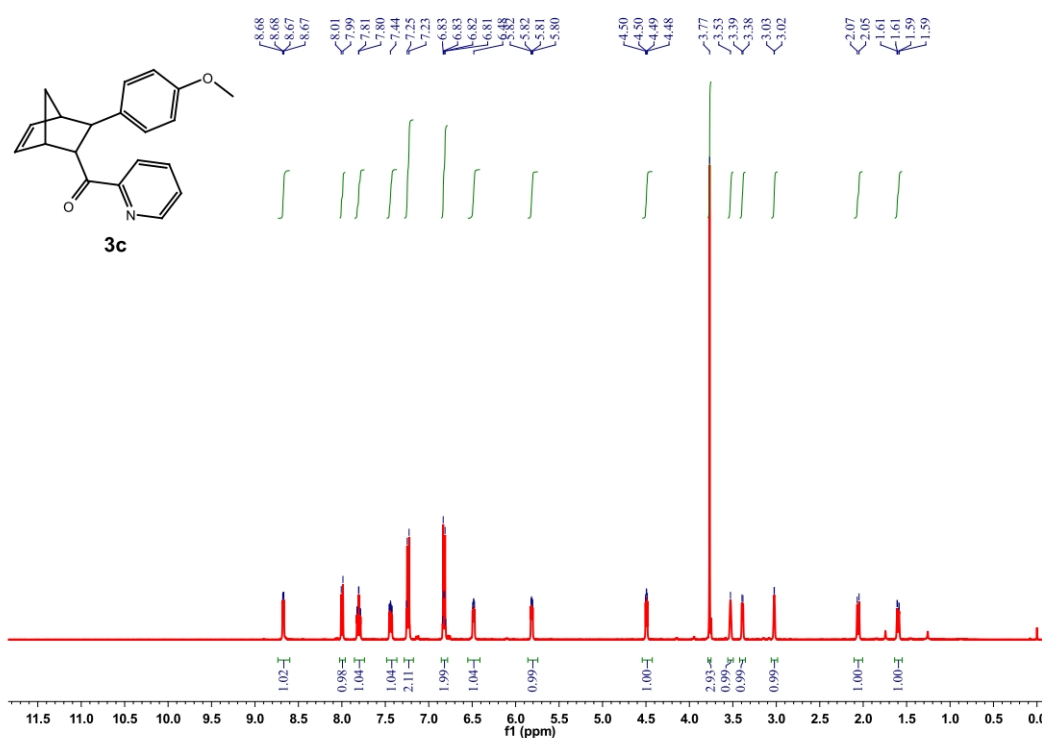



(3-(4-chlorophenyl)bicyclo[2.2.1]hept-5-en-2-yl)(pyridin-2-yl)methanone (**3d**)

$^1\text{H}$  NMR (400 MHz,  $\text{CDCl}_3$ , *endo* isomer):  $\delta$  8.67 (d,  $J = 4.6$  Hz, 1H), 8.00 (d,  $J = 7.8$  Hz, 1H), 7.83 (dd,  $J = 8.5, 6.9$  Hz, 1H), 7.46 (dd,  $J = 7.4, 4.9$  Hz, 1H), 7.25 – 7.10 (m, 4H), 6.48 (dd,  $J = 5.4, 3.2$  Hz, 1H), 5.83 (dd,  $J = 5.5, 2.7$  Hz, 1H), 4.46 (dd,  $J = 5.1, 3.5$  Hz, 1H), 3.54 (s, 1H), 3.40 (d,  $J = 5.1$  Hz, 1H), 3.05 (s, 1H), 2.01 (d,  $J = 8.5$  Hz, 1H), 1.62 (d,  $J = 8.6$  Hz, 1H).

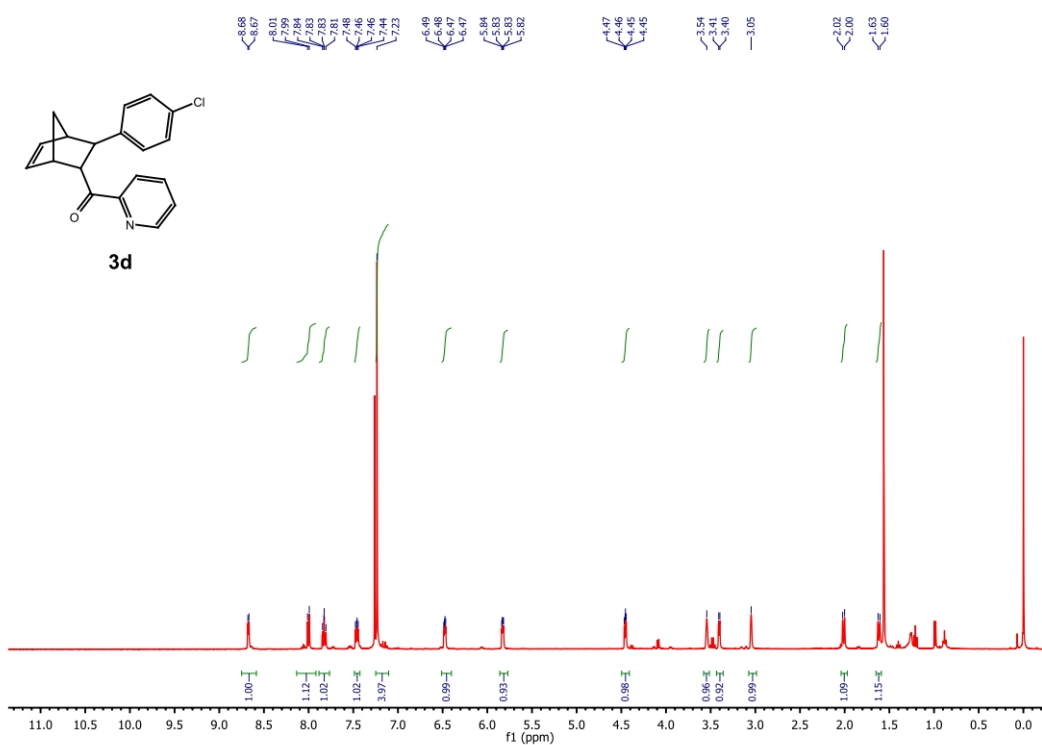

(3-(4-nitrophenyl)bicyclo[2.2.1]hept-5-en-2-yl)(pyridin-2-yl)methanone (**3e**)

$^1\text{H}$  NMR (400 MHz, *endo* isomer):  $\delta$  8.66 (d,  $J = 4.5$  Hz, 1H), 8.07 (m, 3H), 7.84 (t,  $J = 7.6$  Hz, 1H), 7.47 (m, 3H), 6.52 – 6.44 (m, 1H), 5.88 (dd,  $J = 5.3, 2.5$  Hz, 1H), 4.51 – 4.44 (m, 1H), 3.66 – 3.50 (m, 2H), 3.13 (s, 1H), 2.00 (d,  $J = 8.6$  Hz, 1H), 1.67 (d,  $J = 8.4$  Hz, 1H).

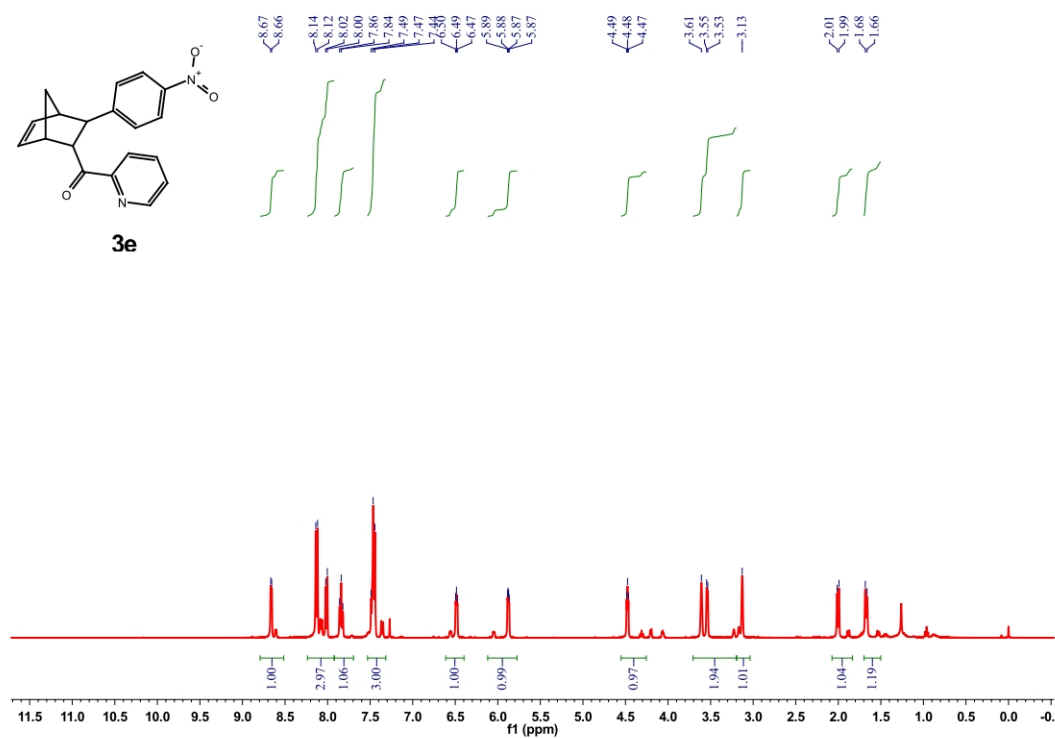

(3-(naphthalen-1-yl)bicyclo[2.2.1]hept-5-en-2-yl)(pyridin-2-yl)methanone (**3f**)

$^1\text{H}$  NMR (400 MHz,  $\text{CDCl}_3$ , *endo* isomer):  $\delta$  8.70 – 8.57 (m, 1H), 8.18 – 7.98 (m, 2H), 7.87 – 7.76 (m, 2H), 7.70 (d,  $J = 8.2$  Hz, 1H), 7.62 (d,  $J = 7.2$  Hz, 1H), 7.49 – 7.37 (m, 4H), 6.68 – 6.57 (m, 1H), 5.97 – 5.89 (m, 1H), 4.74 – 4.65 (m, 1H), 4.07 (d,  $J = 4.8$  Hz, 1H), 3.53 (s, 1H), 3.21 (s, 1H), 2.19 (dd,  $J = 8.4$  Hz, 1H), 1.69 (dd,  $J = 8.3$  Hz, 1H).

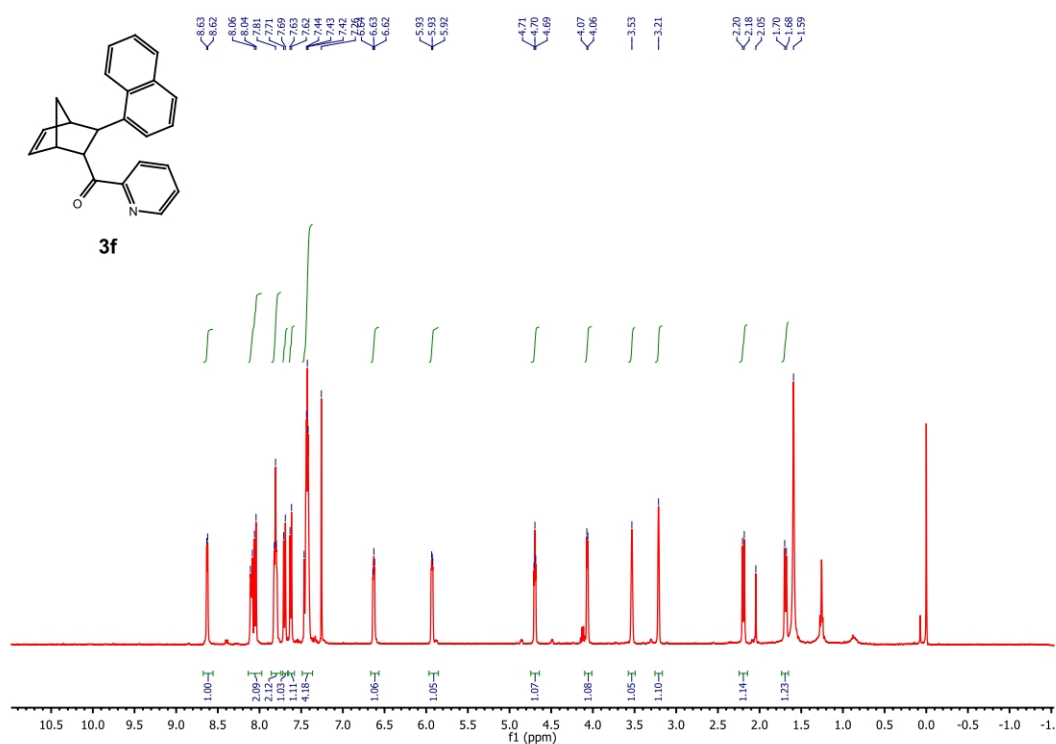

(1-methyl-1H-imidazol-2-yl)(3-phenylbicyclo[2.2.1]hept-5-en-2-yl)methanone (**5a**)

$^1\text{H}$  NMR (400 MHz,  $\text{CDCl}_3$ , *endo* isomer):  $\delta$  7.26 – 7.15 (m, 4H), 7.11 – 7.03 (m, 2H), 6.93 (s, 1H), 6.44 (dd,  $J = 5.0, 3.4$  Hz, 1H), 5.82 (dd,  $J = 5.4, 2.6$  Hz, 1H), 4.35 – 4.26 (m, 1H), 3.89 (s, 3H), 3.53 (s, 1H), 3.28 (d,  $J = 5.1$  Hz, 1H), 2.97 (s, 1H), 1.96 (d,  $J = 8.5$  Hz, 1H), 1.52 (d,  $J = 8.5$  Hz, 1H).

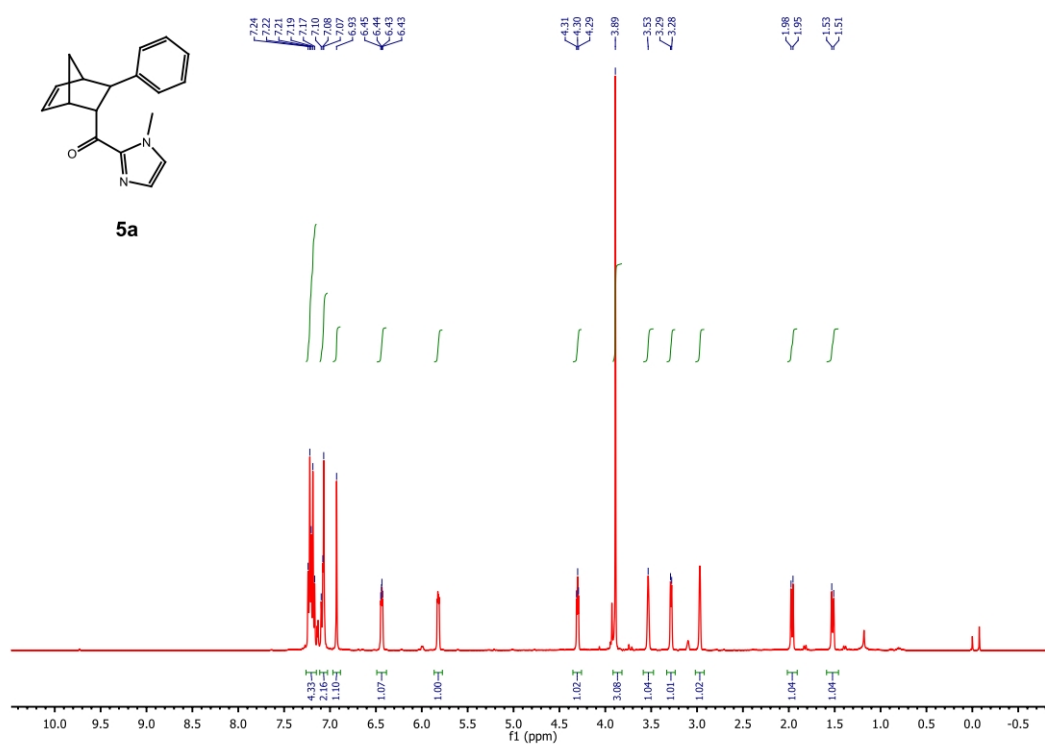

(1-methyl-1H-imidazol-2-yl)(3-p-tolylbicyclo[2.2.1]hept-5-en-2-yl)methanone (**5b**)

$^1\text{H}$  NMR (400 MHz,  $\text{CDCl}_3$ ) *endo* isomer:  $\delta$  = 7.21 (d,  $J=7.8$ , 2H), 7.17 – 7.05 (m, 2H), 7.05 – 6.97 (m, 2H), 6.55 – 6.45 (m, 1H), 5.89 (dd,  $J=5.3$ , 2.4, 1H), 4.42 – 4.34 (m, 1H), 3.95 (s, 3H), 3.60 (s, 1H), 3.32 (d,  $J=5.0$ , 1H), 3.00 (s, 1H), 2.29 (s, 3H), 2.04 (d,  $J=8.4$ , 1H), 1.58 (d,  $J=8.5$ , 1H). *exo* isomer:  $\delta$  = 7.17 – 7.05 (m, 5H), 7.05 – 6.97 (m, 1H), 6.55 – 6.45 (m, 1H), 6.11 – 6.04 (m, 1H), 4.42 – 4.34 (m, 1H), 3.99 (m, 4H), 3.16 (m, 2H), 2.27 (s, 3H), 2.04 (d,  $J=8.4$ , 1H), 1.46 (d,  $J=8.5$ , 1H).

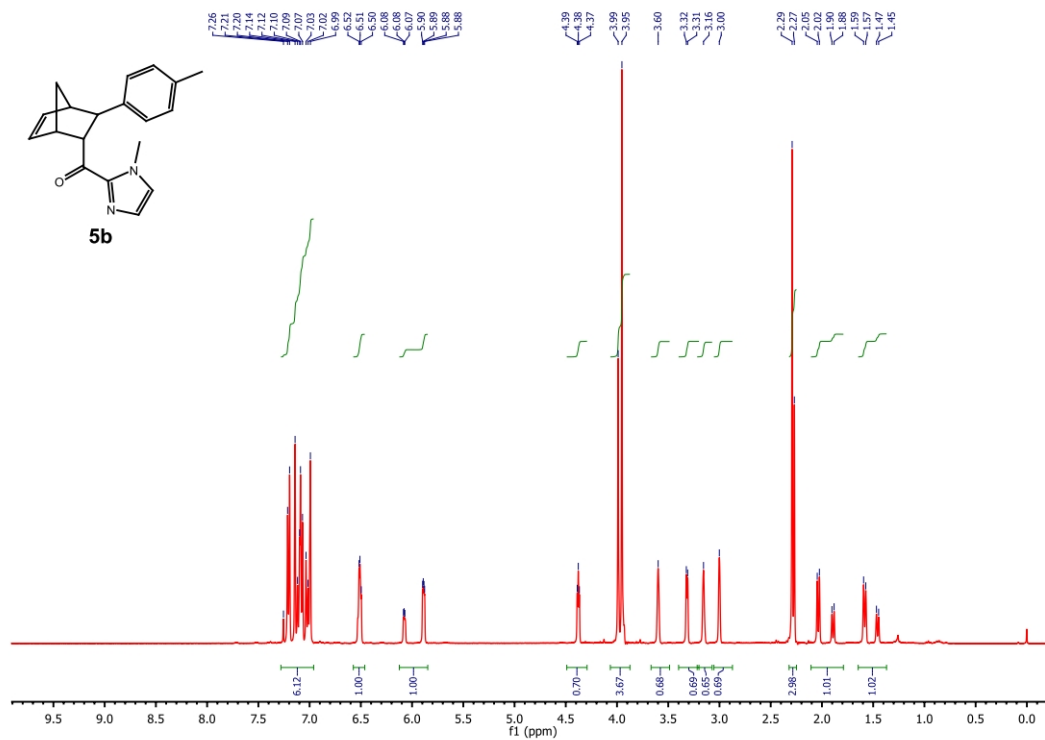

(3-(4-methoxyphenyl)bicyclo[2.2.1]hept-5-en-2-yl)(1-methyl-1H-imidazol-2-yl)methanone (**5c**)

$^1\text{H}$  NMR (400 MHz,  $\text{CDCl}_3$ , *endo* isomer):  $\delta$  7.15 (d,  $J = 8.6$  Hz, 2H), 7.07 (s, 1H), 6.92 (s, 1H), 6.74 (d,  $J = 8.7$  Hz, 2H), 6.42 (dd,  $J = 5.5, 3.2$  Hz, 1H), 5.81 (dd,  $J = 5.6, 2.7$  Hz, 1H), 4.27 (dd,  $J = 5.2, 3.5$  Hz, 1H), 3.89 (s, 3H), 3.69 (s, 3H), 3.51 (s, 1H), 3.22 (d,  $J = 4.8$  Hz, 1H), 2.91 (s, 1H), 1.95 (d,  $J = 8.5$  Hz, 1H), 1.51 (dd,  $J = 8.6, 1.5$  Hz, 1H).

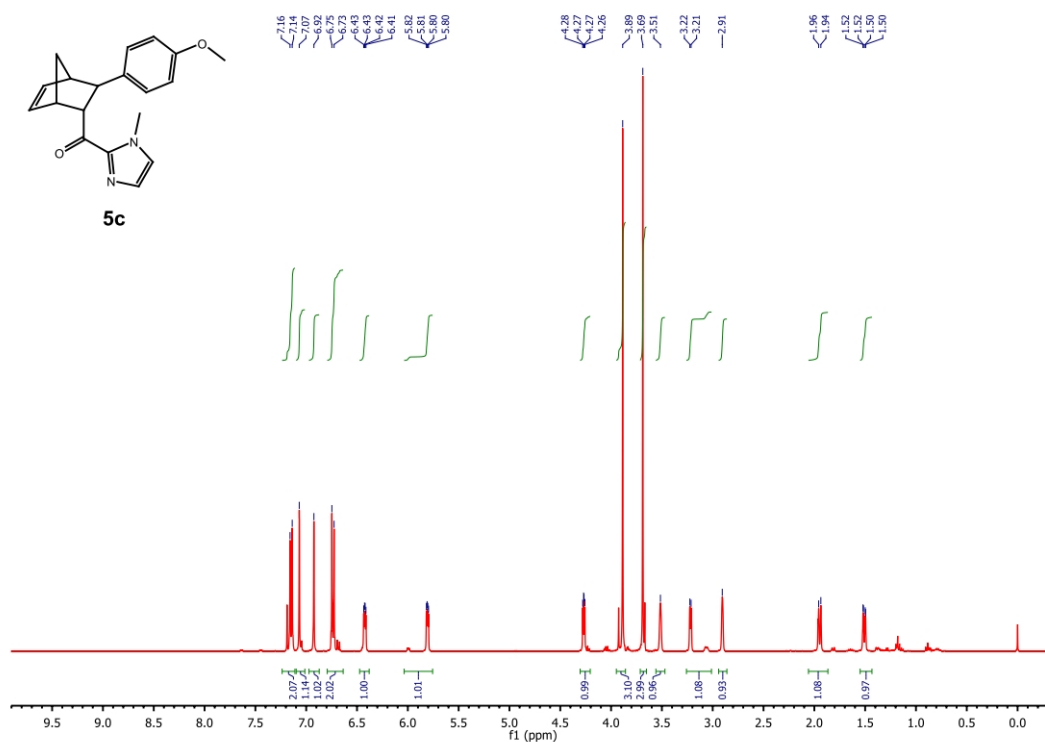

(3-(4-chlorophenyl)bicyclo[2.2.1]hept-5-en-2-yl)(1-methyl-1H-imidazol-2-yl)methanone (**5d**)

$^1\text{H}$  NMR (400 MHz,  $\text{CDCl}_3$ , *endo* isomer):  $\delta$  7.20 – 7.05 (m, 5H), 6.94 (s, 1H), 6.42 (dd,  $J = 5.6$ , 3.2 Hz, 1H), 5.82 (dd,  $J = 5.6$ , 2.8 Hz, 1H), 4.23 (dd,  $J = 5.2$ , 3.5 Hz, 1H), 3.88 (d,  $J = 7.8$  Hz, 3H), 3.53 (s, 1H), 3.24 (dd,  $J = 5.3$ , 1.6 Hz, 1H), 2.93 (d,  $J = 1.3$  Hz, 1H), 1.90 (d,  $J = 8.6$  Hz, 1H), 1.53 (dd,  $J = 8.6$ , 1.6 Hz, 1H).

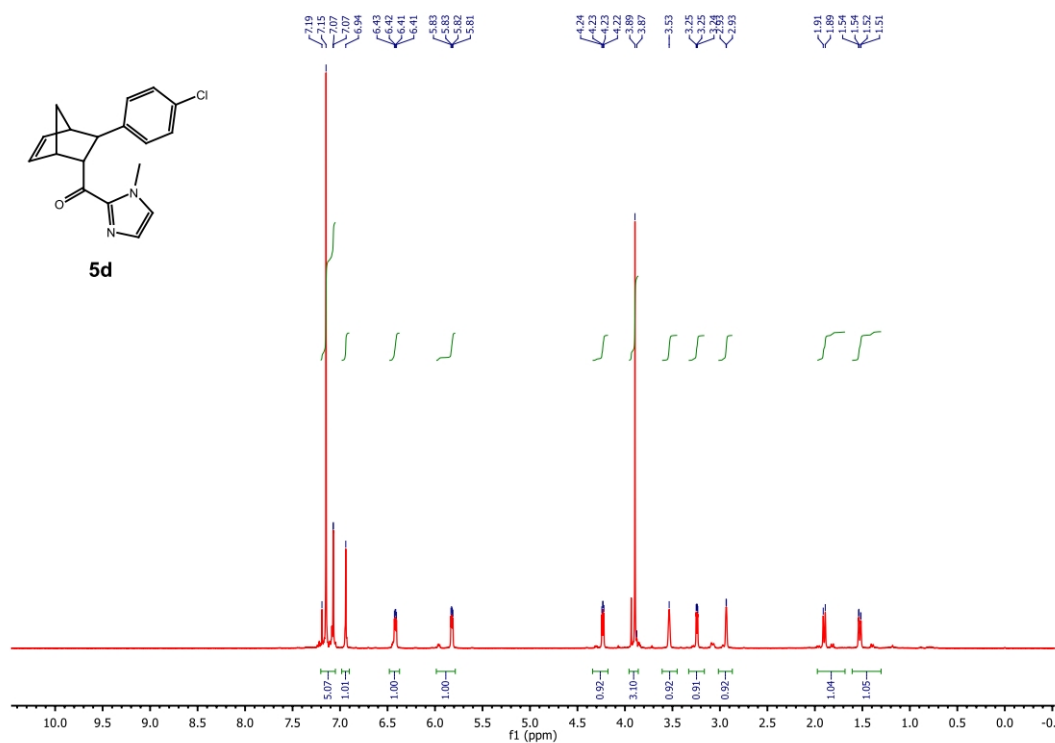

(3-(4-bromophenyl)bicyclo[2.2.1]hept-5-en-2-yl)(1-methyl-1H-imidazol-2-yl)methanone (**5e**)

$^1\text{H}$  NMR (400 MHz,  $\text{CDCl}_3$ , *endo* isomer):  $\delta$  7.43 – 7.29 (m, 2H), 7.21 – 7.05 (m, 3H), 7.01 (s, 1H), 6.58 – 6.39 (m, 1H), 5.90 (dd,  $J = 5.3, 2.5$  Hz, 1H), 4.42 – 4.25 (m, 1H), 3.96 (s, 3H), 3.61 (s, 1H), 3.30 (d,  $J = 5.1$  Hz, 1H), 3.00 (s, 1H), 1.97 (d,  $J = 8.6$  Hz, 1H), 1.60 (d,  $J = 8.5$  Hz, 1H).

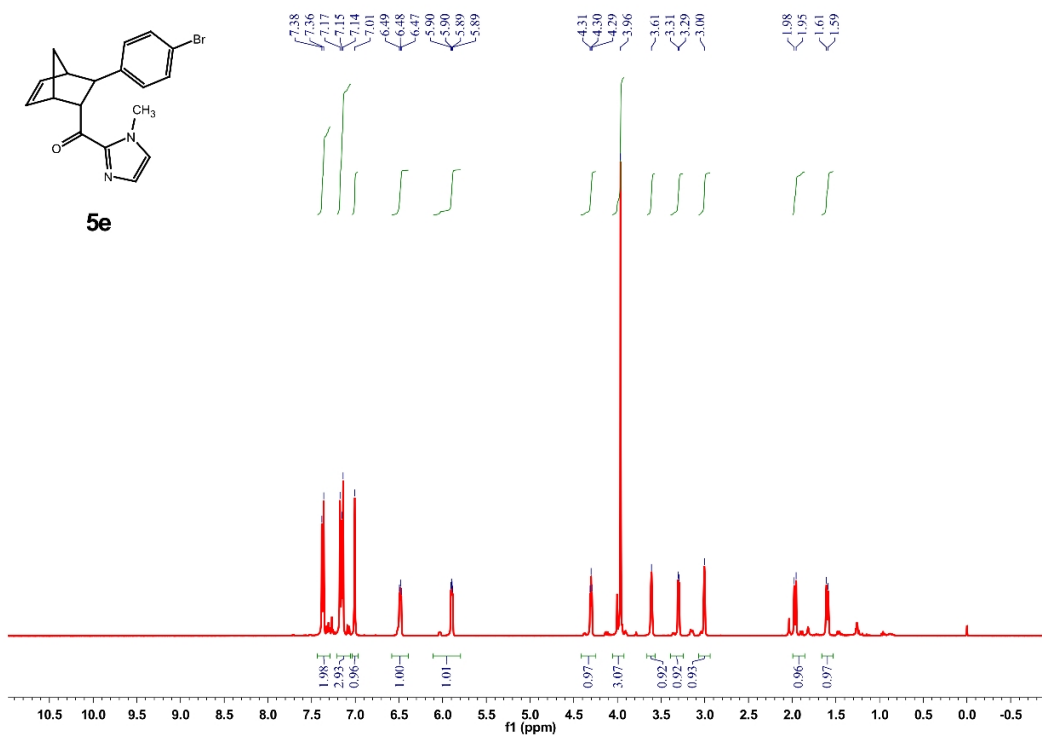



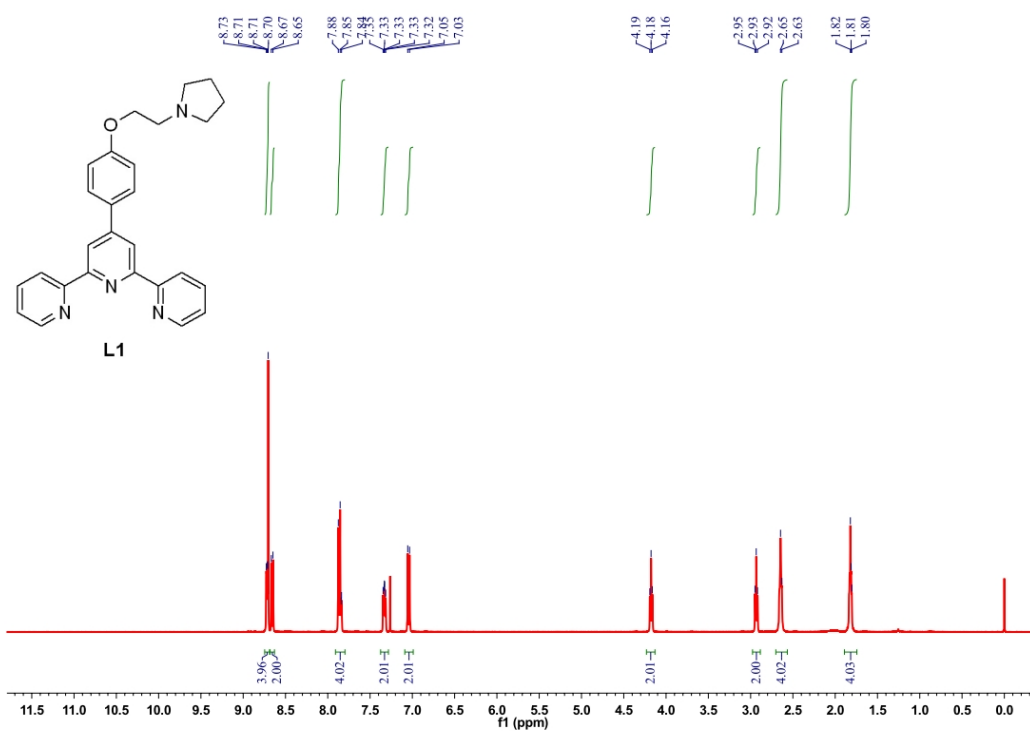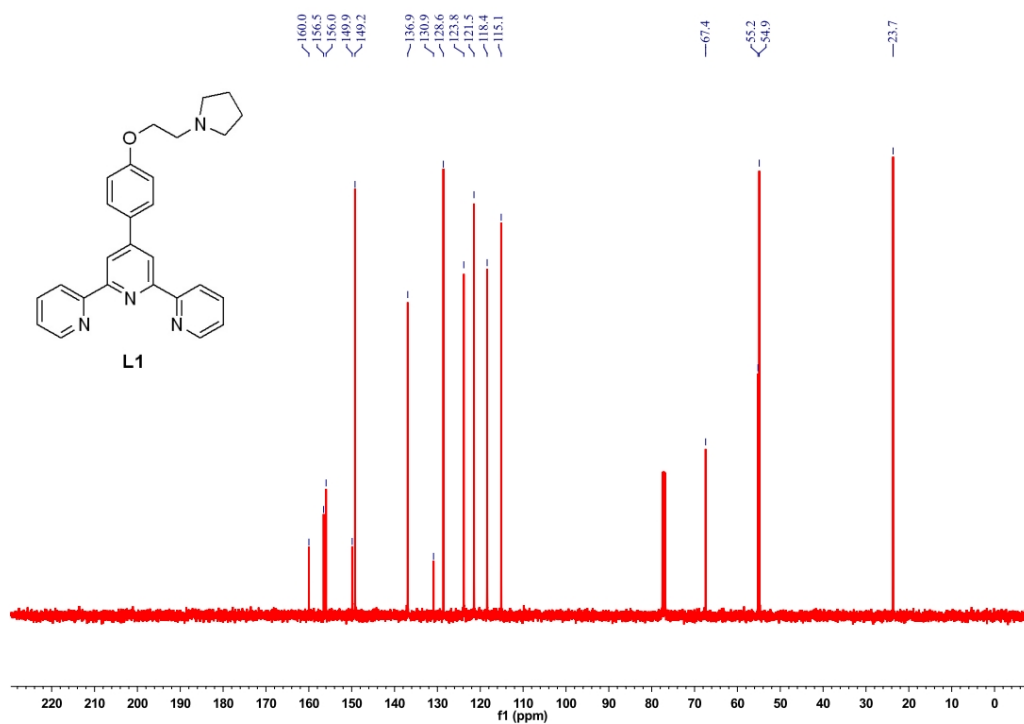

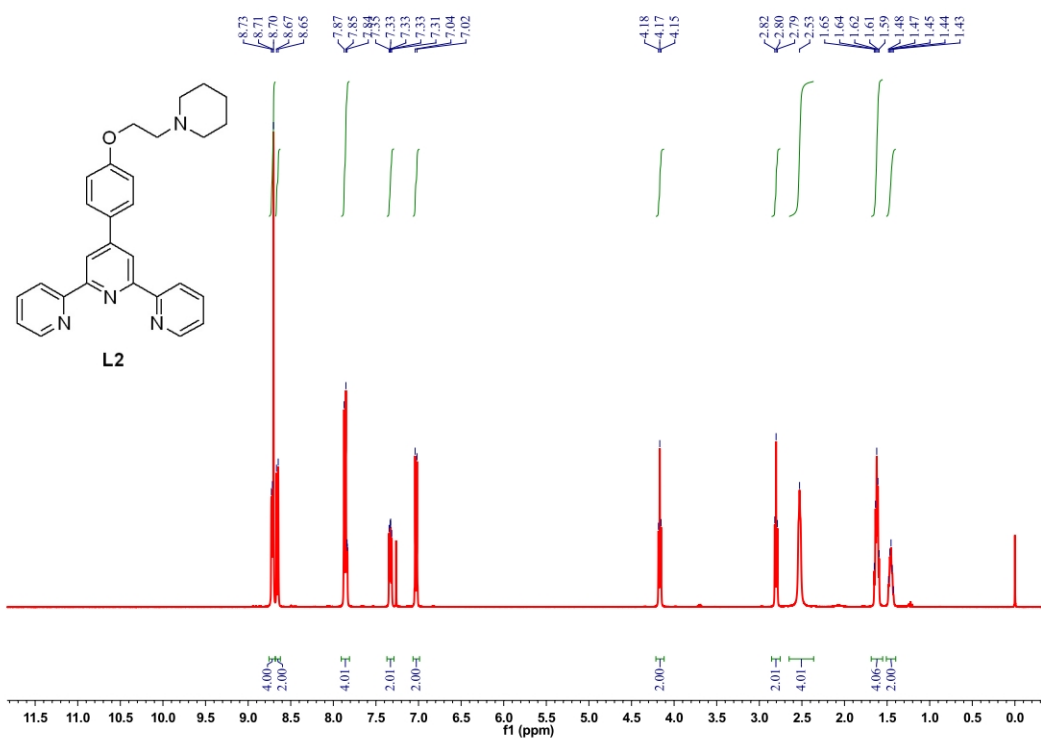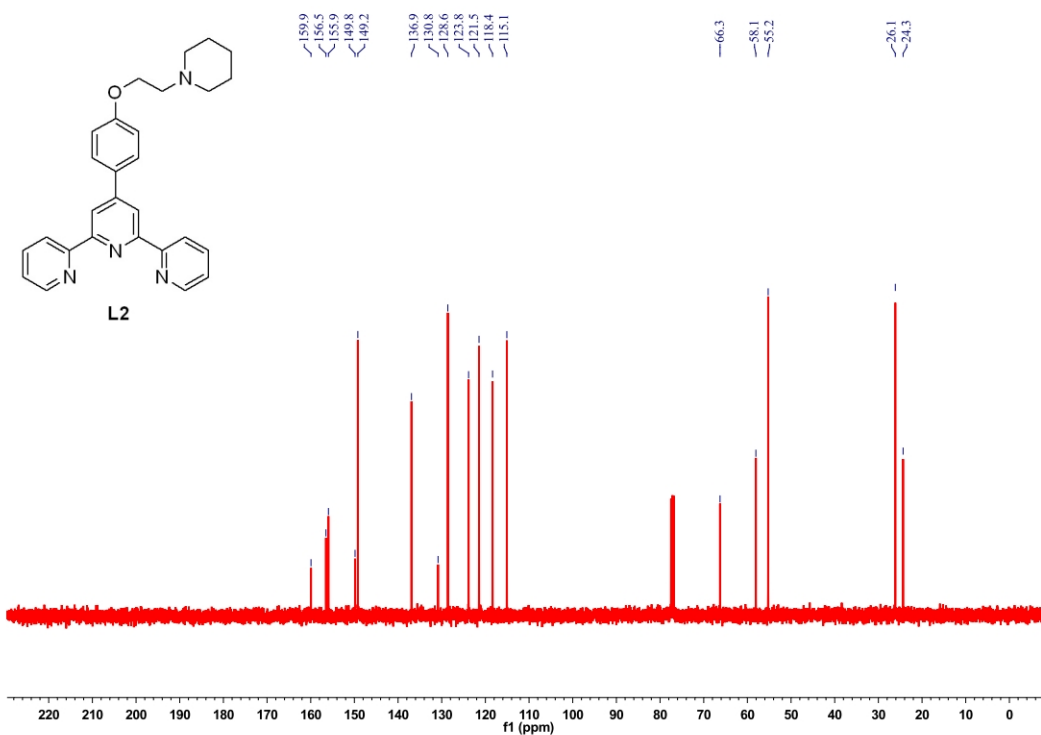

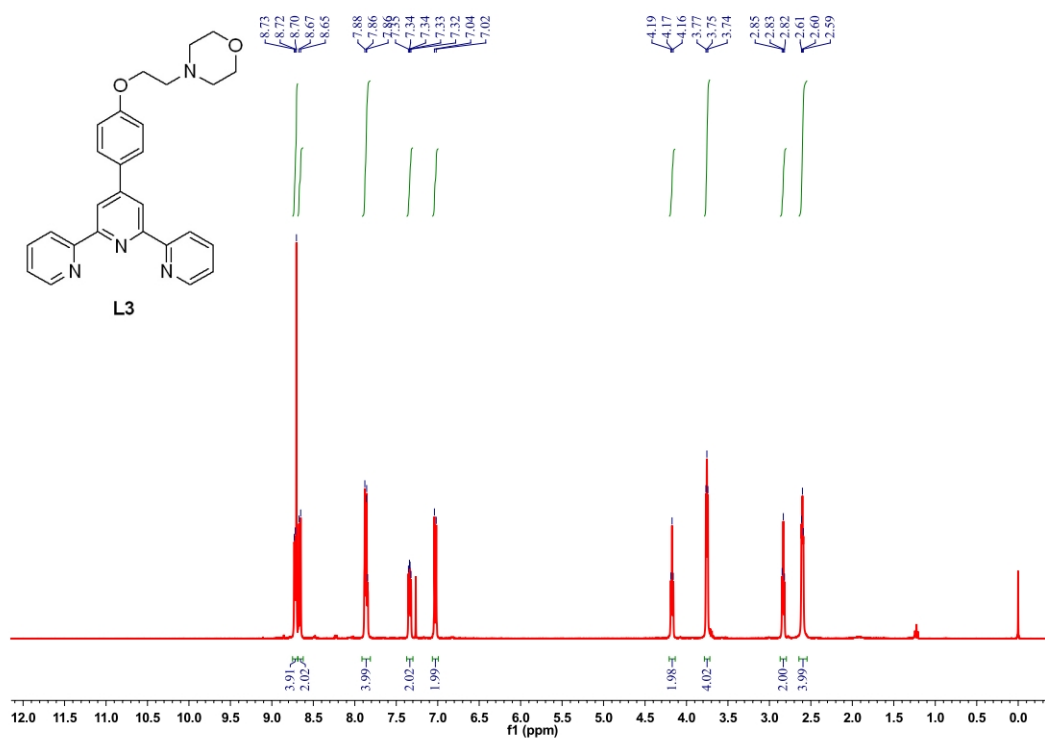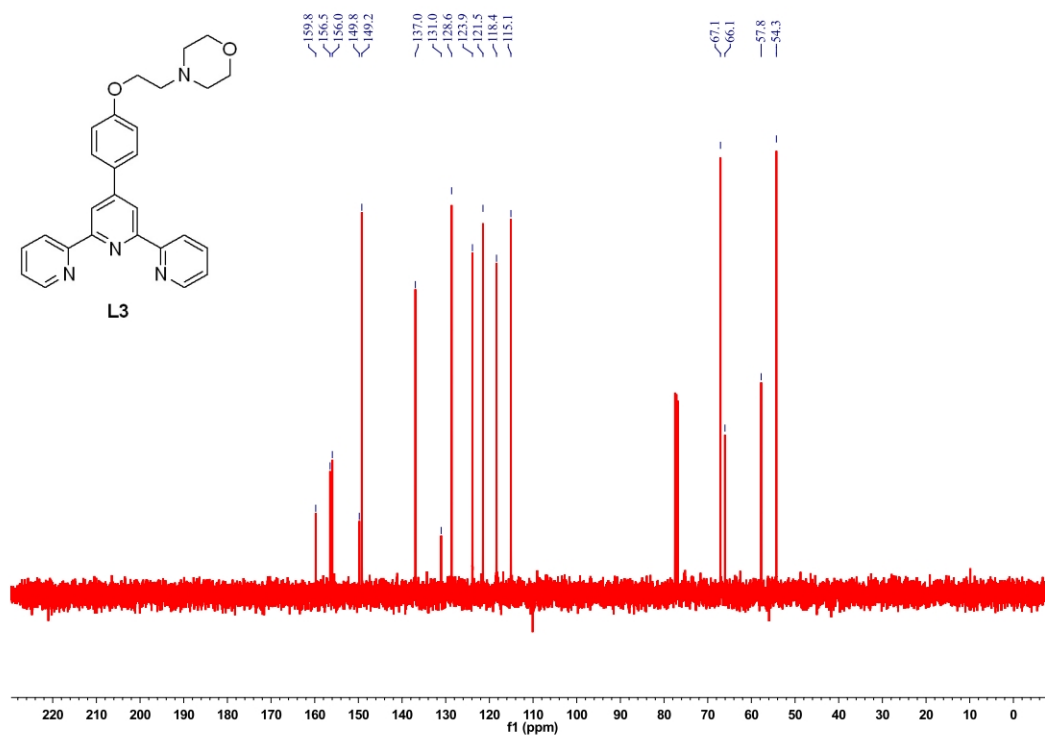

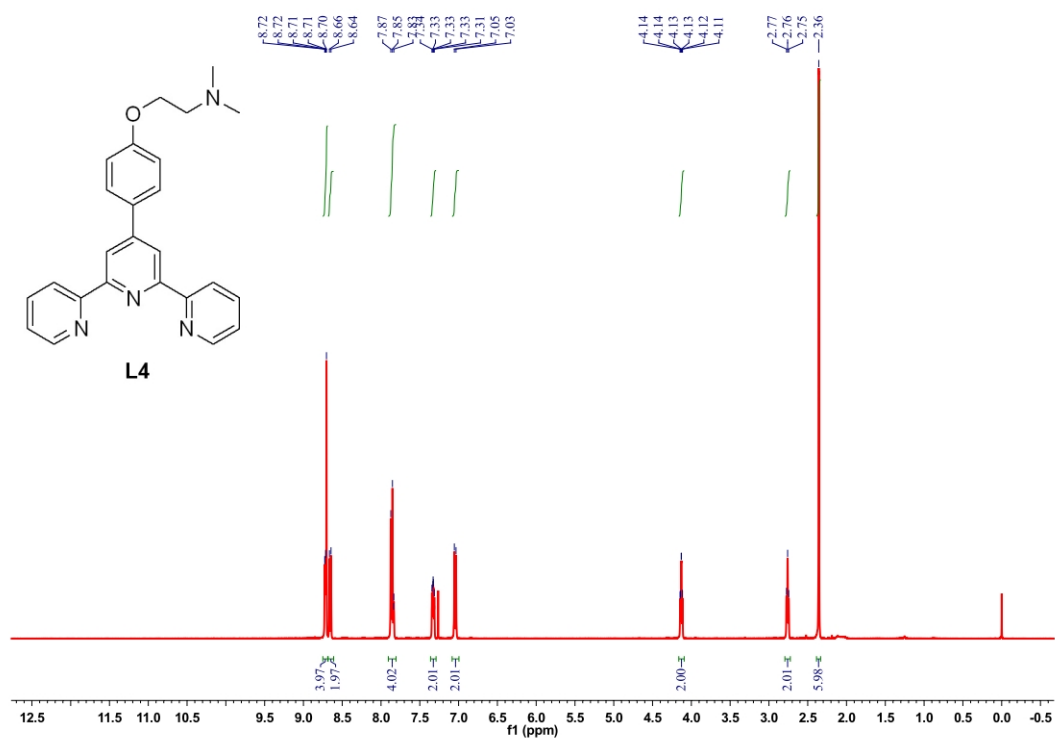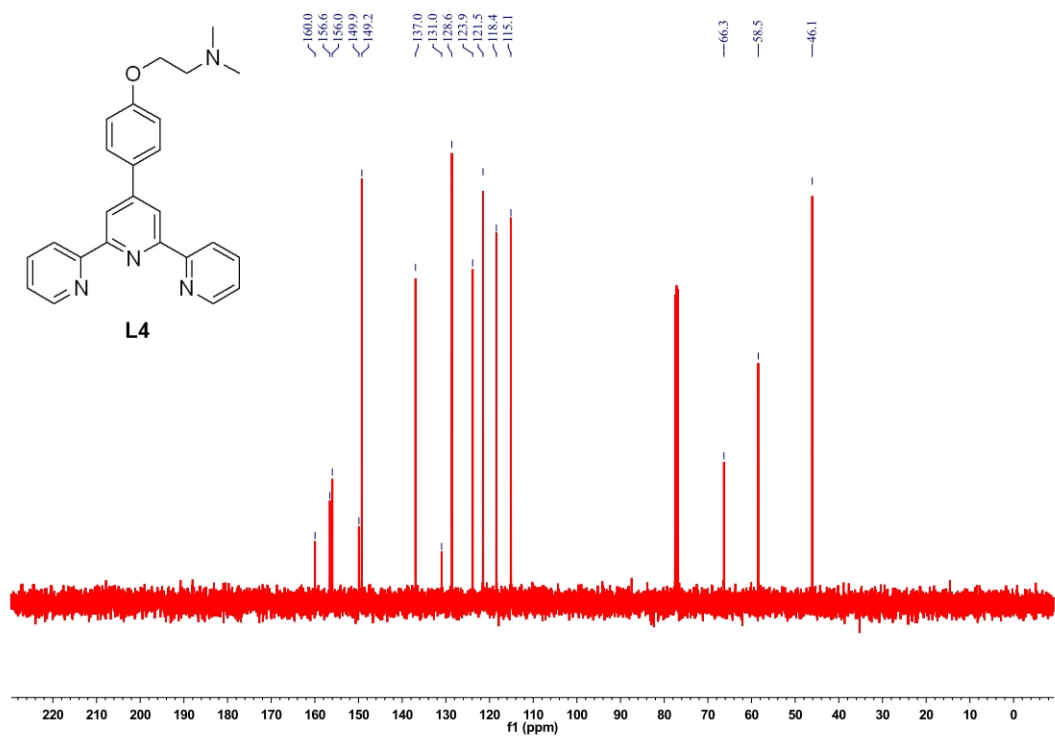

## HPLC Traces of Products

### 1. Product 3a

#### (1) Racemic 3a

Retention times: 13.0, 14.7 (*exo* isomer) and 17.0, 22.0 (*endo* isomer) mins

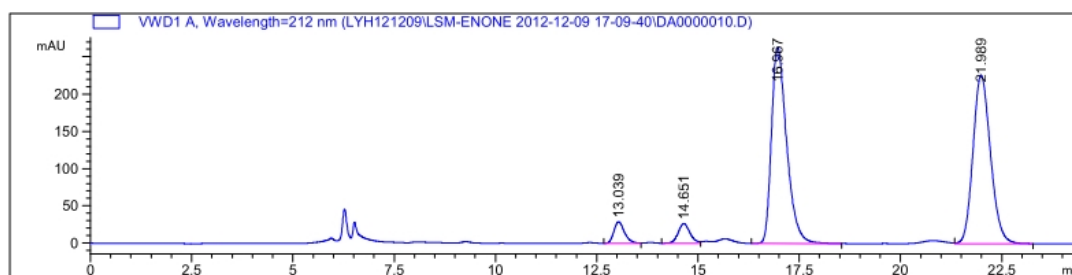

#### Area Percent Report

Sorted By : Signal  
Multiplier: : 1.0000  
Dilution: : 1.0000  
Use Multiplier & Dilution Factor with ISTDs

Signal 1: VWD1 A, Wavelength=212 nm

| Peak # | RetTime [min] | Type | Width [min] | Area mAU*s | Height [mAU] | Area %  |
|--------|---------------|------|-------------|------------|--------------|---------|
| 1      | 13.039        | VV   | 0.2821      | 545.54974  | 29.38276     | 3.6834  |
| 2      | 14.651        | VV   | 0.3169      | 557.33136  | 26.79624     | 3.7630  |
| 3      | 16.967        | VB   | 0.4002      | 6895.75879 | 263.32379    | 46.5584 |
| 4      | 21.989        | VB   | 0.4662      | 6812.34863 | 226.33138    | 45.9952 |

Totals : 1.48110e4 545.83416

\*\*\* End of Report \*\*\*

(2) Product **3a** from the Diels-Alder reaction catalyzed by HT21-NH4-CuL1 (*endo* isomer:  
94% *ee*)

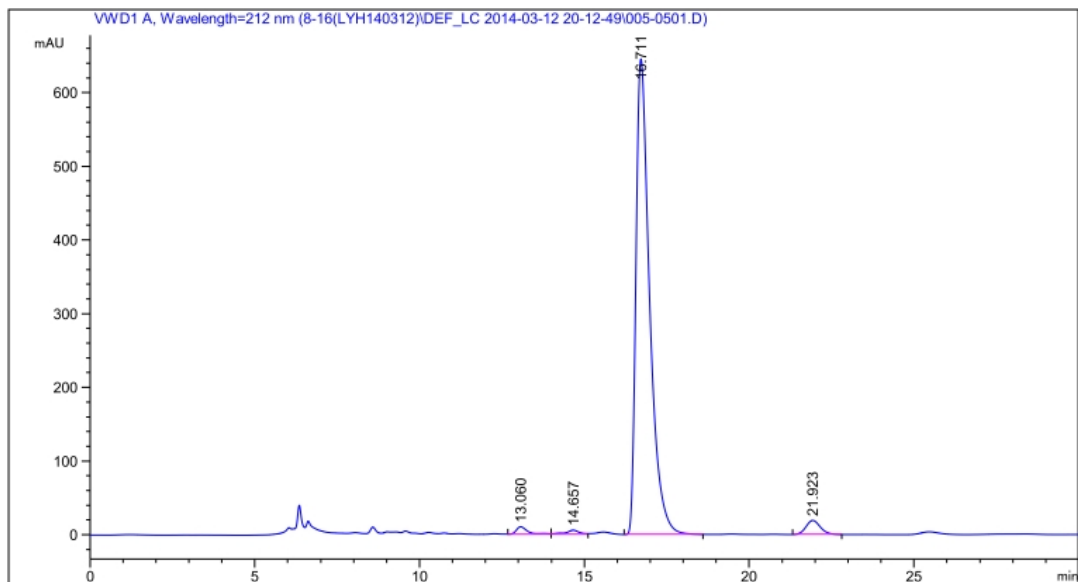

面积百分比报告

排序 : 信号  
乘积因子 : 1.0000  
稀释因子 : 1.0000  
内标使用乘积因子和稀释因子

信号 1: VWD1 A, Wavelength=212 nm

| 峰 # | 保留时间 [min] | 类型 | 峰宽 [min] | 峰面积 mAU *s | 峰高 [mAU]  | 峰面积 %   |
|-----|------------|----|----------|------------|-----------|---------|
| 1   | 13.060     | VV | 0.3693   | 257.80942  | 10.34860  | 1.3184  |
| 2   | 14.657     | VV | 0.4261   | 175.22066  | 5.80997   | 0.8961  |
| 3   | 16.711     | VB | 0.4314   | 1.85428e4  | 645.19928 | 94.8286 |
| 4   | 21.923     | BB | 0.4650   | 578.18036  | 19.11723  | 2.9568  |

(3) Product **3a** from the Diels-Alder reaction catalyzed by L-HT21-NH4-CuL1 (*endo* isomer:  
-92% *ee*)

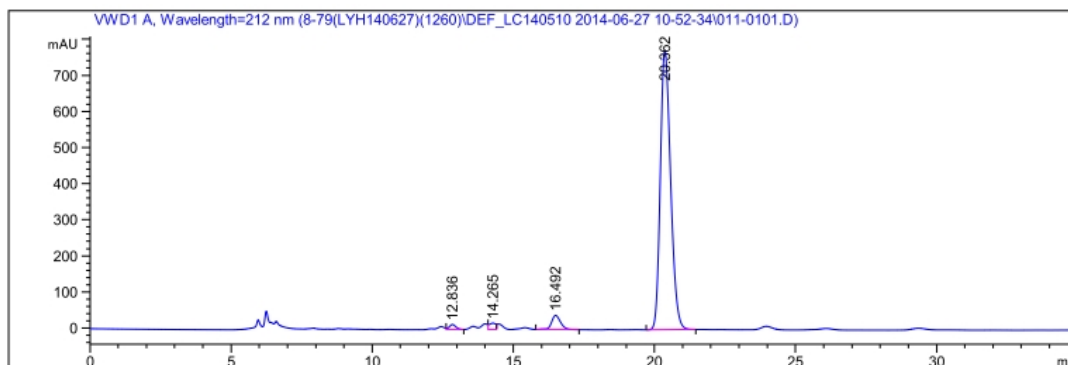

=====  
面积百分比报告  
=====

排序 : 信号  
乘积因子 : 1.0000  
稀释因子 : 1.0000  
内标使用乘积因子和稀释因子

信号 1: VWD1 A, Wavelength=212 nm

| 峰 # | 保留时间 [min] | 类型 | 峰宽 [min] | 峰面积 [mAU*s] | 峰高 [mAU]  | 峰面积 %   |
|-----|------------|----|----------|-------------|-----------|---------|
| 1   | 12.836     | VV | 0.2516   | 244.88458   | 14.56330  | 1.1630  |
| 2   | 14.265     | VV | 0.2383   | 305.47574   | 18.18080  | 1.4508  |
| 3   | 16.492     | VB | 0.3457   | 902.52008   | 39.65071  | 4.2864  |
| 4   | 20.362     | VB | 0.3917   | 1.96027e4   | 773.94250 | 93.0998 |

总量 : 2.10556e4 846.33732

=====

2. Product **3b**(1) Racemic **3b**Retention times: 11.0, 12.6 (*exo* isomer) and 13.4, 18.1 (*endo* isomer) mins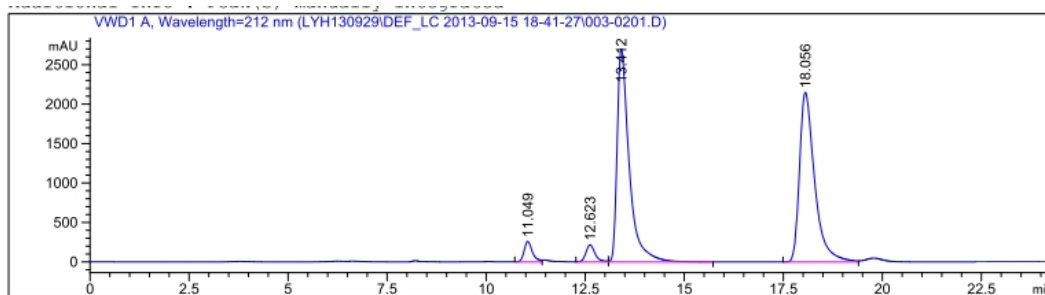=====  
Area Percent Report  
=====

Sorted By : Signal  
Multiplier: : 1.0000  
Dilution: : 1.0000  
Use Multiplier & Dilution Factor with ISTDs

Signal 1: VWD1 A, Wavelength=212 nm

| Peak # | RetTime [min] | Type | Width [min] | Area [mAU*s] | Height [mAU] | Area %  |
|--------|---------------|------|-------------|--------------|--------------|---------|
| 1      | 11.049        | VV   | 0.2193      | 3786.92505   | 260.22565    | 3.1164  |
| 2      | 12.623        | VV   | 0.2440      | 3466.84985   | 216.15584    | 2.8530  |
| 3      | 13.412        | VB   | 0.3139      | 5.71527e4    | 2701.50098   | 47.0337 |
| 4      | 18.056        | VV   | 0.3987      | 5.71079e4    | 2151.03516   | 46.9969 |

Totals : 1.21514e5 5328.91762

=====  
\*\*\* End of Report \*\*\*



(2) Product **3b** from the Diels-Alder reaction catalyzed by HT21-NH4-CuL1 (*endo* isomer: 96% *ee*)

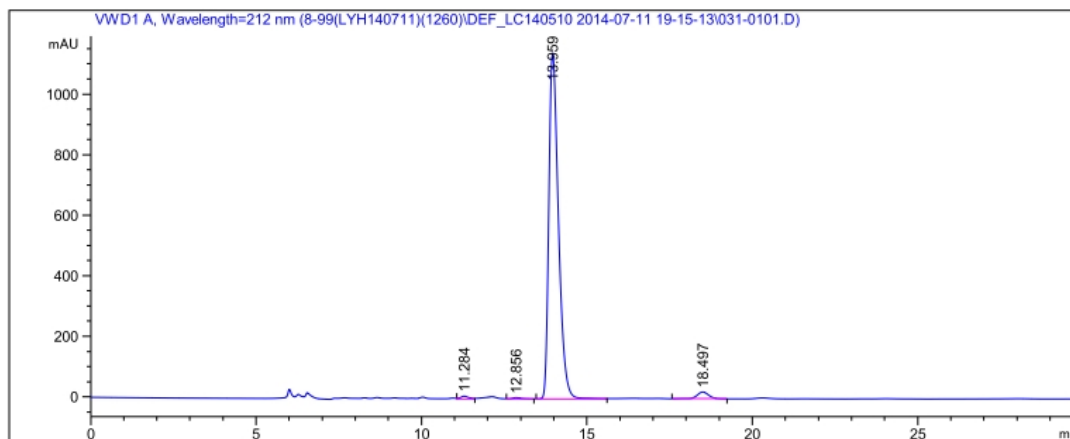

=====  
 面积百分比报告  
 =====

排序 : 信号  
 乘积因子 : 1.0000  
 稀释因子 : 1.0000  
 内标使用乘积因子和稀释因子

信号 1: VWD1 A, Wavelength=212 nm

| 峰 # | 保留时间 [min] | 类型 | 峰宽 [min] | 峰面积 [mAU*s] | 峰高 [mAU]   | 峰面积 %   |
|-----|------------|----|----------|-------------|------------|---------|
| 1   | 11.284     | VV | 0.2662   | 183.02797   | 9.92121    | 0.7637  |
| 2   | 12.856     | VB | 0.3407   | 114.43951   | 4.75194    | 0.4775  |
| 3   | 13.959     | BB | 0.3087   | 2.30806e4   | 1141.76819 | 96.3063 |
| 4   | 18.497     | VB | 0.3937   | 587.75977   | 22.82935   | 2.4525  |

总量 : 2.39658e4 1179.27069

3. Product **3c**(1) Racemic **3c**Retention times: 13.8, 14.2 (*exo* isomer) and 16.6, 22.8 (*endo* isomer) mins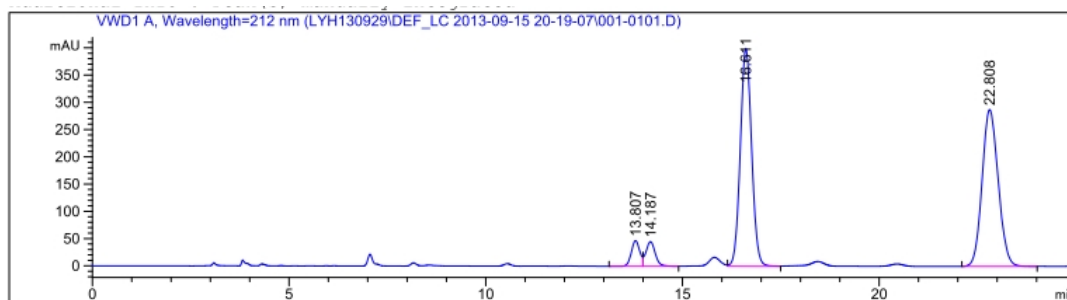

=====  
 Area Percent Report  
 =====

Sorted By : Signal  
 Multiplier: : 1.0000  
 Dilution: : 1.0000  
 Use Multiplier & Dilution Factor with ISTDs

Signal 1: VWD1 A, Wavelength=212 nm

| Peak # | RetTime [min] | Type | Width [min] | Area [mAU*s] | Height [mAU] | Area %  |
|--------|---------------|------|-------------|--------------|--------------|---------|
| 1      | 13.807        | BV   | 0.2309      | 708.48175    | 47.10786     | 4.0206  |
| 2      | 14.187        | VB   | 0.2528      | 748.52386    | 45.24762     | 4.2478  |
| 3      | 16.611        | VB   | 0.3120      | 7994.28027   | 399.87192    | 45.3670 |
| 4      | 22.808        | BB   | 0.4420      | 8170.07568   | 287.82578    | 46.3646 |

Totals : 1.76214e4 780.05318

=====  
 \*\*\* End of Report \*\*\*

(2) Product **3c** from the Diels-Alder reaction catalyzed by HT21-NH4-CuL1 (*endo* isomer: 98% *ee*)

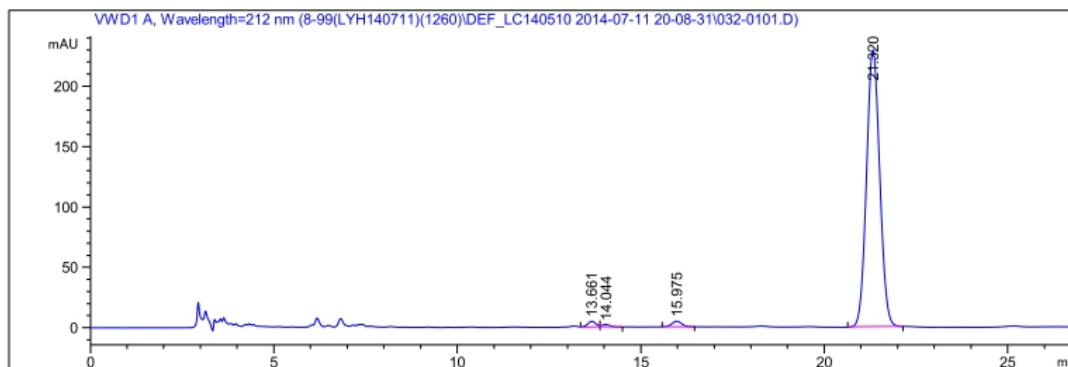

=====  
面积百分比报告  
=====

排序 : 信号  
乘积因子 : 1.0000  
稀释因子 : 1.0000  
内标使用乘积因子和稀释因子

信号 1: VWD1 A, Wavelength=212 nm

| 峰 # | 保留时间 [min] | 类型 | 峰宽 [min] | 峰面积 [mAU*s] | 峰高 [mAU]  | 峰面积 %   |
|-----|------------|----|----------|-------------|-----------|---------|
| 1   | 13.661     | VV | 0.2450   | 77.32947    | 4.83356   | 1.3055  |
| 2   | 14.044     | VB | 0.2372   | 32.54331    | 2.08844   | 0.5494  |
| 3   | 15.975     | BB | 0.2897   | 86.83061    | 4.64072   | 1.4659  |
| 4   | 21.320     | BB | 0.3893   | 5726.47998  | 229.08356 | 96.6791 |

总量 : 5923.18337 240.64628

=====

4. Product **3d**(1) Racemic **3d**Retention times: 20.8, 26.9 (*exo* isomer) and 25.4, 44.4 (*endo* isomer) mins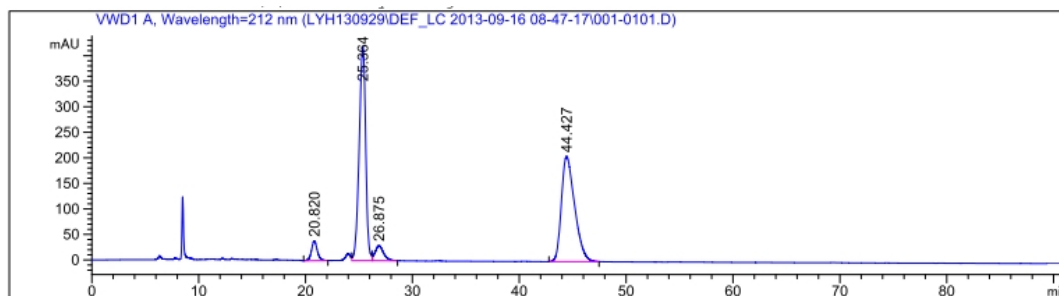=====  
Area Percent Report  
=====

Sorted By : Signal  
Multiplier: : 1.0000  
Dilution: : 1.0000  
Use Multiplier & Dilution Factor with ISTDs

Signal 1: VWD1 A, Wavelength=212 nm

| Peak # | RetTime [min] | Type | Width [min] | Area [mAU*s] | Height [mAU] | Area %  |
|--------|---------------|------|-------------|--------------|--------------|---------|
| 1      | 20.820        | BB   | 0.5783      | 1459.81567   | 38.59794     | 3.7885  |
| 2      | 25.364        | VV   | 0.6586      | 1.77287e4    | 418.76682    | 46.0090 |
| 3      | 26.875        | VB   | 0.8094      | 1611.82507   | 29.70839     | 4.1830  |
| 4      | 44.427        | BB   | 1.3103      | 1.77327e4    | 206.02675    | 46.0196 |

Totals : 3.85330e4 693.09989

=====  
\*\*\* End of Report \*\*\*

(2) Product **3d** from the Diels-Alder reaction catalyzed by HT21-NH4-CuL1 (*endo* isomer:  
93% *ee*)

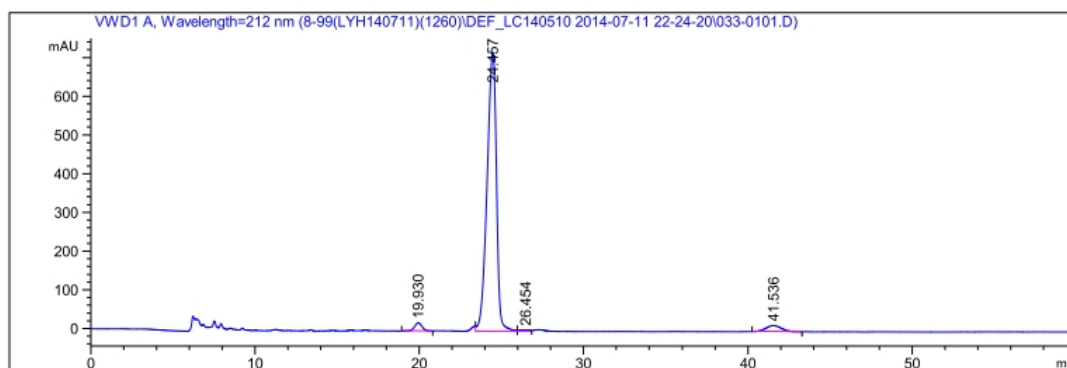

=====  
面积百分比报告  
=====

排序 : 信号  
乘积因子 : 1.0000  
稀释因子 : 1.0000  
内标使用乘积因子和稀释因子

信号 1: VWD1 A, Wavelength=212 nm

| 峰 # | 保留时间 [min] | 类型 | 峰宽 [min] | 峰面积 [mAU*s] | 峰高 [mAU]  | 峰面积 %   |
|-----|------------|----|----------|-------------|-----------|---------|
| 1   | 19.930     | BB | 0.4927   | 654.14752   | 20.77306  | 2.1491  |
| 2   | 24.457     | VB | 0.6143   | 2.85767e4   | 720.53961 | 93.8845 |
| 3   | 26.454     | BV | 0.6010   | 162.57109   | 3.53301   | 0.5341  |
| 4   | 41.536     | BB | 0.9626   | 1044.74170  | 15.76636  | 3.4323  |

总量 : 3.04382e4 760.61205

=====

5. Product **3e**(1) Racemic **3e**Retention times: 12.5, 16.0 (*exo* isomer) and 14.6, 18.1 (*endo* isomer) mins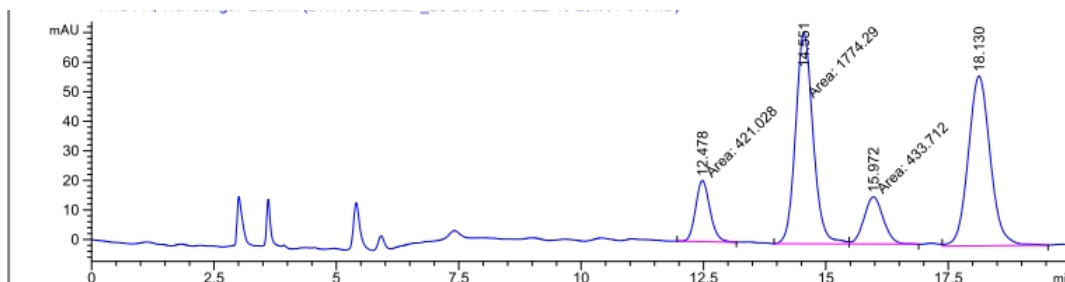

```

=====
                          Area Percent Report
=====

```

```

Sorted By      :      Signal
Multiplier:    :      1.0000
Dilution:      :      1.0000
Use Multiplier & Dilution Factor with ISTDs

```

```

Signal 1: VWD1 A, Wavelength=212 nm

```

| Peak # | RetTime [min] | Type | Width [min] | Area [mAU*s] | Height [mAU] | Area %  |
|--------|---------------|------|-------------|--------------|--------------|---------|
| 1      | 12.478        | MM   | 0.3388      | 421.02759    | 20.71424     | 9.5208  |
| 2      | 14.551        | MF   | 0.4143      | 1774.29187   | 71.37769     | 40.1225 |
| 3      | 15.972        | FM   | 0.4531      | 433.71246    | 15.95338     | 9.8077  |
| 4      | 18.130        | VV   | 0.4826      | 1793.14966   | 57.39640     | 40.5490 |

```

Totals :                4422.18158  165.44171

```

```

=====
*** End of Report ***

```

(2) Product **3e** from the Diels-Alder reaction catalyzed by HT21-NH4-CuL1 (*endo* isomer: 99% *ee*)

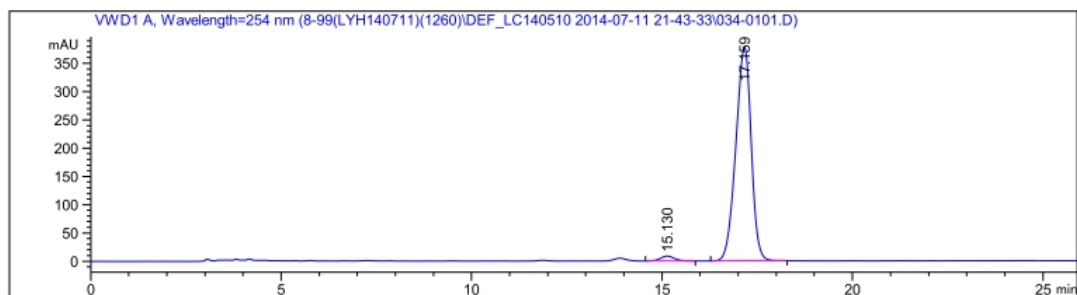

=====  
面积百分比报告  
=====

排序 : 信号  
乘积因子 : 1.0000  
稀释因子 : 1.0000  
内标使用乘积因子和稀释因子

信号 1: VWD1 A, Wavelength=254 nm

| 峰 # | 保留时间 [min] | 类型 | 峰宽 [min] | 峰面积 [mAU*s] | 峰高 [mAU]  | 峰面积 %   |
|-----|------------|----|----------|-------------|-----------|---------|
| 1   | 15.130     | BB | 0.3914   | 223.85844   | 8.76132   | 2.0660  |
| 2   | 17.159     | BB | 0.4373   | 1.06117e4   | 377.44269 | 97.9340 |

总量 : 1.08355e4 386.20401

=====

6. Product **3f**(1) Racemic **3f**

Retention times: 7.4 and 10.8 mins

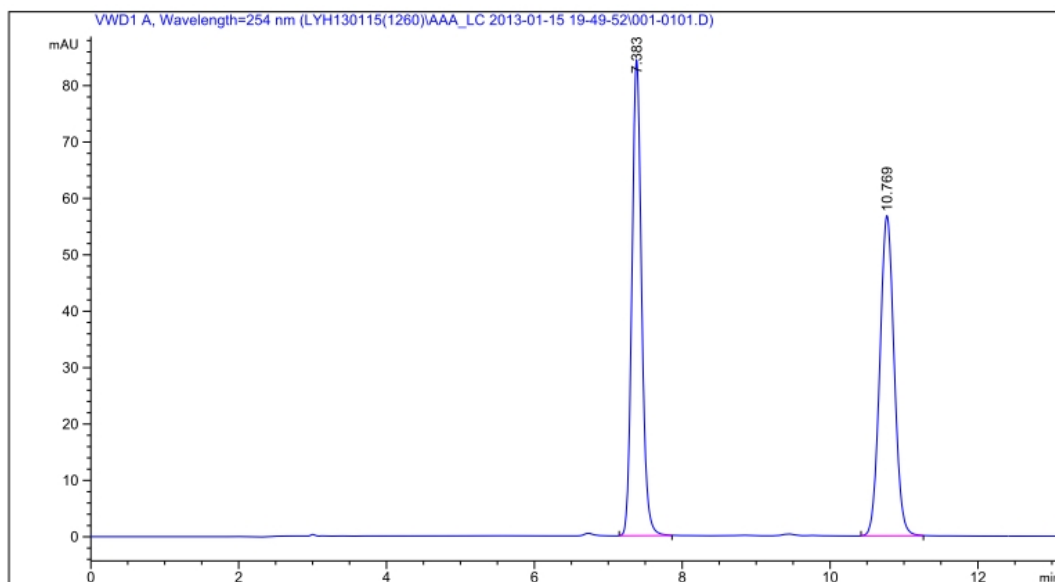=====  
Area Percent Report  
=====

Sorted By : Signal  
Multiplier: : 1.0000  
Dilution: : 1.0000  
Use Multiplier & Dilution Factor with ISTDs

Signal 1: VWD1 A, Wavelength=254 nm

| Peak # | RetTime [min] | Type | Width [min] | Area [mAU*s] | Height [mAU] | Area %  |
|--------|---------------|------|-------------|--------------|--------------|---------|
| 1      | 7.383         | BB   | 0.1393      | 764.62390    | 84.33156     | 49.9907 |
| 2      | 10.769        | BB   | 0.2097      | 764.90961    | 56.76023     | 50.0093 |

Totals : 1529.53351 141.09179

=====  
\*\*\* End of Report \*\*\*  
=====



(2) Product **3f** from the Diels-Alder reaction catalyzed by HT21-NH<sub>4</sub>-CuL1 (*endo* isomer: 98% *ee*)

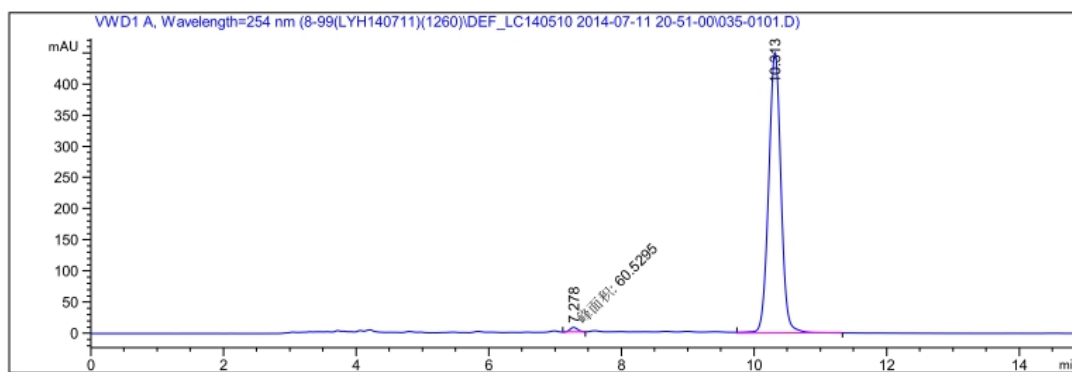

=====  
 面积百分比报告  
 =====

排序 : 信号  
 乘积因子 : 1.0000  
 稀释因子 : 1.0000  
 内标使用乘积因子和稀释因子

信号 1: VWD1 A, Wavelength=254 nm

| 峰 # | 保留时间 [min] | 类型 | 峰宽 [min] | 峰面积 [mAU*s] | 峰高 [mAU]  | 峰面积 %   |
|-----|------------|----|----------|-------------|-----------|---------|
| 1   | 7.278      | MM | 0.1379   | 60.52946    | 7.31544   | 1.0320  |
| 2   | 10.313     | VB | 0.1985   | 5804.98926  | 450.19852 | 98.9680 |

总量 : 5865.51872 457.51395

=====

7. Product **5a**(1) Racemic **5a**Retention times: 21.9, 27.1 (*exo* isomer) and 25.1, 35.1 (*endo* isomer) mins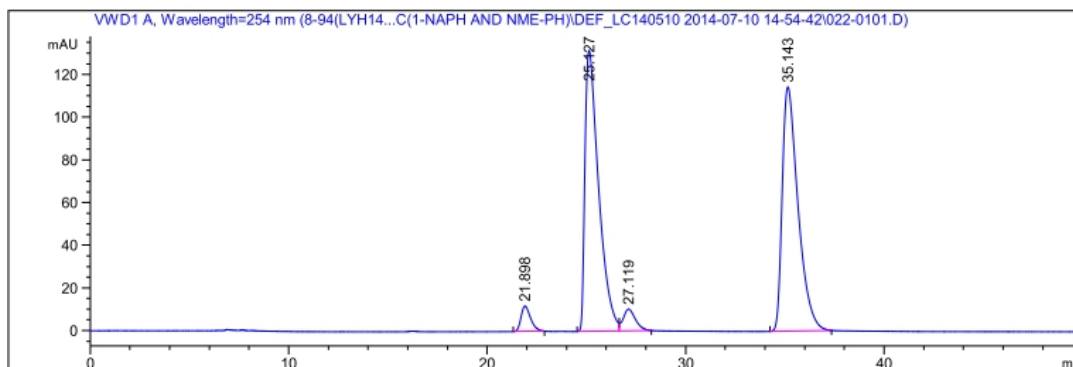=====  
面积百分比报告  
=====

排序 : 信号  
 乘积因子 : 1.0000  
 稀释因子 : 1.0000  
 内标使用乘积因子和稀释因子

信号 1: VWD1 A, Wavelength=254 nm

| 峰 # | 保留时间 [min] | 类型 | 峰宽 [min] | 峰面积 [mAU*s] | 峰高 [mAU]  | 峰面积 %   |
|-----|------------|----|----------|-------------|-----------|---------|
| 1   | 21.898     | BB | 0.5063   | 403.26956   | 11.93801  | 2.9921  |
| 2   | 25.127     | BV | 0.7178   | 6307.14355  | 131.65181 | 46.7968 |
| 3   | 27.119     | VB | 0.6349   | 439.48395   | 10.23832  | 3.2608  |
| 4   | 35.143     | BB | 0.8303   | 6327.81787  | 114.42680 | 46.9502 |

总量 : 1.34777e4 268.25494

=====

(2) Product **5a** from the Diels-Alder reaction catalyzed by HT21-NH<sub>4</sub>-CuL1 (*endo* isomer: 98% *ee*)

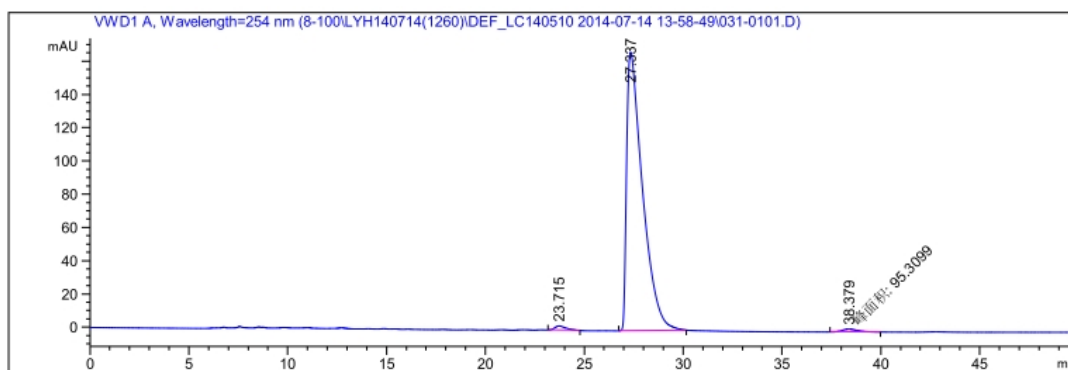

=====  
 面积百分比报告  
 =====

排序 : 信号  
 乘积因子 : 1.0000  
 稀释因子 : 1.0000  
 内标使用乘积因子和稀释因子

信号 1: VWD1 A, Wavelength=254 nm

| 峰 # | 保留时间 [min] | 类型 | 峰宽 [min] | 峰面积 [mAU*s] | 峰高 [mAU]  | 峰面积 %   |
|-----|------------|----|----------|-------------|-----------|---------|
| 1   | 23.715     | BB | 0.5441   | 101.82387   | 2.52898   | 1.0641  |
| 2   | 27.337     | BB | 0.8175   | 9371.50879  | 167.48953 | 97.9398 |
| 3   | 38.379     | MM | 0.9306   | 95.30985    | 1.70703   | 0.9961  |

总量 : 9568.64251 171.72554

=====

8. Product **5b**(1) Racemic **5b**Retention times: 30.0, 35.5 (*exo* isomer) and 37.5, 40.3 (*endo* isomer) mins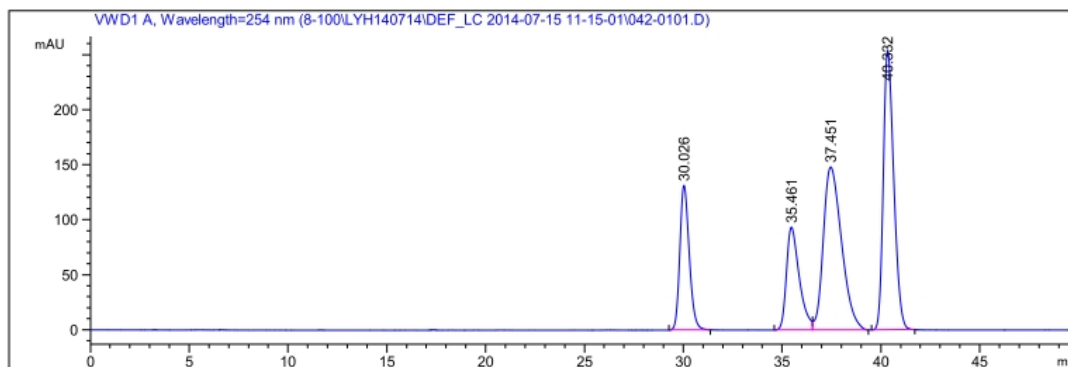=====  
面积百分比报告  
=====

排序 : 信号  
乘积因子 : 1.0000  
稀释因子 : 1.0000  
内标使用乘积因子和稀释因子

信号 1: VWD1 A, Wavelength=254 nm

| 峰 # | 保留时间 [min] | 类型 | 峰宽 [min] | 峰面积 mAU *s | 峰高 [mAU]  | 峰面积 %   |
|-----|------------|----|----------|------------|-----------|---------|
| 1   | 30.026     | BB | 0.5077   | 4340.55664 | 131.41245 | 15.8289 |
| 2   | 35.461     | BV | 0.6773   | 4233.79053 | 93.40224  | 15.4396 |
| 3   | 37.451     | VB | 0.9911   | 9511.67090 | 148.08525 | 34.6867 |
| 4   | 40.332     | BB | 0.5671   | 9335.68457 | 254.02907 | 34.0449 |

总量 : 2.74217e4 626.92901

=====

(2) Product **5b** from the Diels-Alder reaction catalyzed by HT21-NH4-CuL1 (*endo* isomer: 94% *ee*)

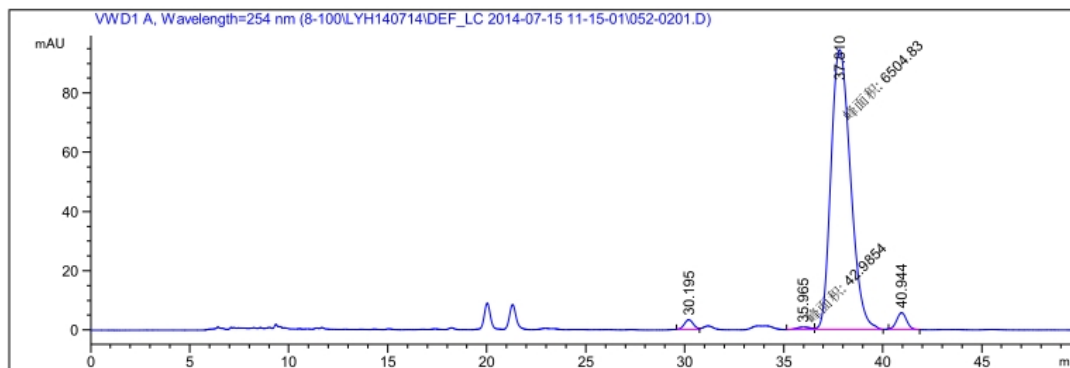

=====  
 面积百分比报告  
 =====

排序 : 信号  
 乘积因子 : 1.0000  
 稀释因子 : 1.0000  
 内标使用乘积因子和稀释因子

信号 1: VWD1 A, Wavelength=254 nm

| 峰 # | 保留时间 [min] | 类型 | 峰宽 [min] | 峰面积 mAU *s | 峰高 [mAU]   | 峰面积 %   |
|-----|------------|----|----------|------------|------------|---------|
| 1   | 30.195     | BV | 0.5047   | 107.16024  | 3.32005    | 1.5619  |
| 2   | 35.965     | MF | 0.8175   | 42.98543   | 8.76339e-1 | 0.6265  |
| 3   | 37.810     | FM | 1.1464   | 6504.83301 | 94.57201   | 94.8076 |
| 4   | 40.944     | BB | 0.5524   | 206.10716  | 5.76660    | 3.0040  |

总量 : 6861.08584 104.53500

=====

9. Product **5c**(1) Racemic **5c**Retention times: 14.4, 21.6 (*exo* isomer) and 17.4, 28.0 (*endo* isomer) mins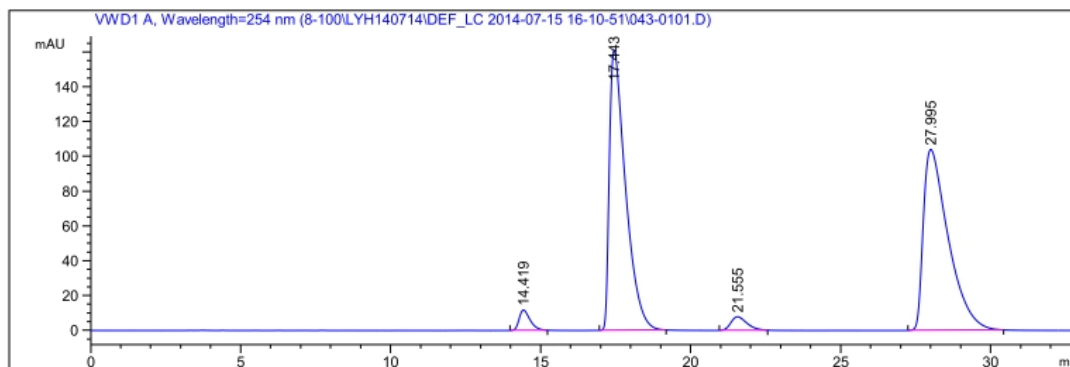

=====  
 面积百分比报告  
 =====

排序 : 信号  
 乘积因子 : 1.0000  
 稀释因子 : 1.0000  
 内标使用乘积因子和稀释因子

信号 1: VWD1 A, Wavelength=254 nm

| 峰 # | 保留时间 [min] | 类型 | 峰宽 [min] | 峰面积 mAU *s | 峰高 [mAU]  | 峰面积 %   |
|-----|------------|----|----------|------------|-----------|---------|
| 1   | 14.419     | BB | 0.3859   | 297.72125  | 11.69005  | 2.3570  |
| 2   | 17.443     | BB | 0.5625   | 6034.53516 | 161.01726 | 47.7733 |
| 3   | 21.555     | BB | 0.5648   | 292.44934  | 7.81286   | 2.3152  |
| 4   | 27.995     | BB | 0.8605   | 6006.88916 | 103.96090 | 47.5545 |

总量 : 1.26316e4 284.48107

=====

(2) Product **5c** from the Diels-Alder reaction catalyzed by HT21-NH4-CuL1 (*endo* isomer:

>99% *ee*)

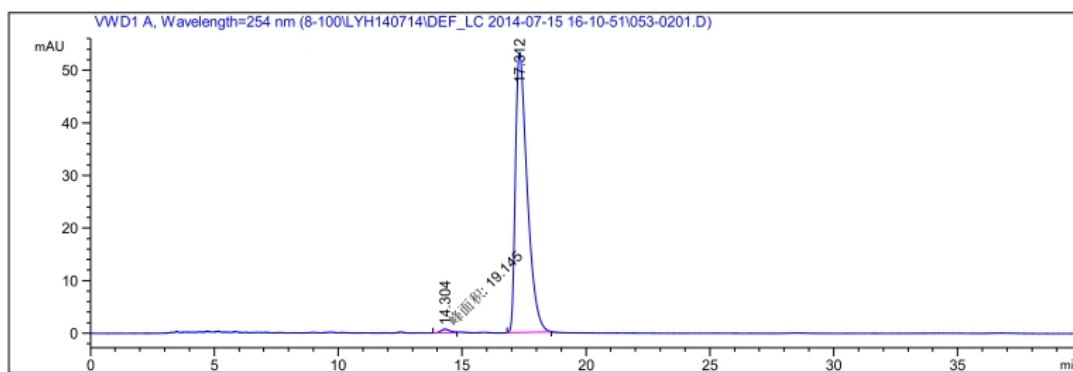

=====  
 面积百分比报告  
 =====

排序 : 信号  
 乘积因子 : 1.0000  
 稀释因子 : 1.0000  
 内标使用乘积因子和稀释因子

信号 1: VWD1 A, Wavelength=254 nm

| 峰 # | 保留时间 [min] | 类型 | 峰宽 [min] | 峰面积 mAU *s | 峰高 [mAU]   | 峰面积 %   |
|-----|------------|----|----------|------------|------------|---------|
| 1   | 14.304     | MF | 0.4429   | 19.14496   | 7.20490e-1 | 1.0755  |
| 2   | 17.312     | BB | 0.5007   | 1760.96838 | 53.26444   | 98.9245 |

总量 : 1780.11334 53.98493

=====

10. Product **5d**(1) Racemic **5d**Retention times: 6.4, 9.9 (*exo* isomer) and 6.8, 8.8 (*endo* isomer) mins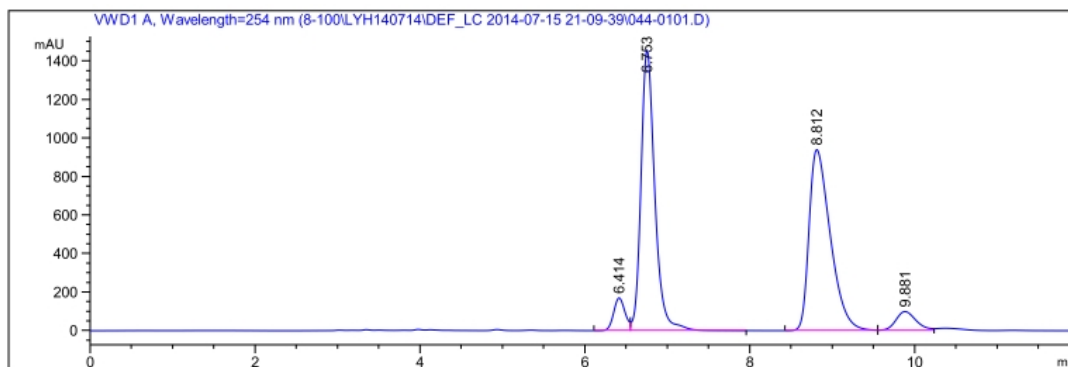=====  
面积百分比报告  
=====

排序 : 信号  
乘积因子 : 1.0000  
稀释因子 : 1.0000  
内标使用乘积因子和稀释因子

信号 1: VWD1 A, Wavelength=254 nm

| 峰 # | 保留时间 [min] | 类型 | 峰宽 [min] | 峰面积 mAU *s | 峰高 [mAU]   | 峰面积 %   |
|-----|------------|----|----------|------------|------------|---------|
| 1   | 6.414      | VV | 0.1485   | 1628.29016 | 169.52763  | 4.3853  |
| 2   | 6.753      | VB | 0.1763   | 1.69098e4  | 1455.40881 | 45.5416 |
| 3   | 8.812      | BV | 0.2750   | 1.68661e4  | 939.32184  | 45.4239 |
| 4   | 9.881      | VV | 0.2670   | 1726.27332 | 99.22031   | 4.6492  |

总量 : 3.71304e4 2663.47859  
=====



(2) Product **5d** from the Diels-Alder reaction catalyzed by HT21-NH4-CuL1 (*endo* isomer: 98% *ee*)

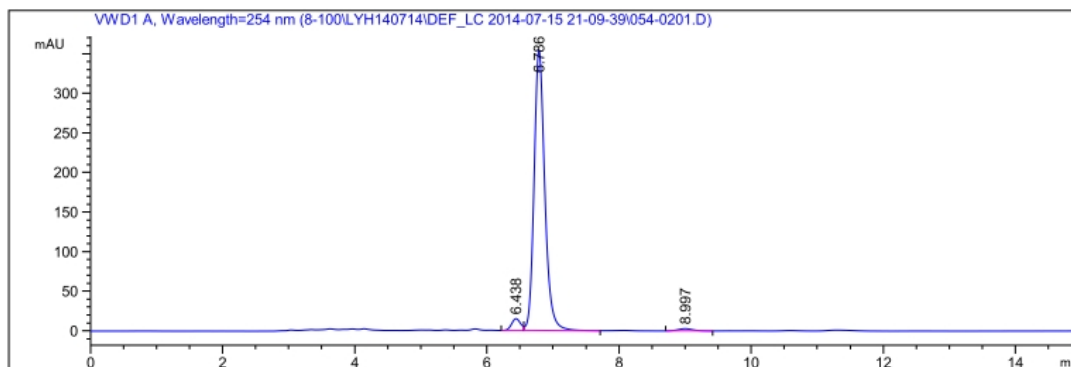

=====  
 面积百分比报告  
 =====

排序 : 信号  
 乘积因子 : 1.0000  
 稀释因子 : 1.0000  
 内标使用乘积因子和稀释因子

信号 1: VWD1 A, Wavelength=254 nm

| 峰 # | 保留时间 [min] | 类型 | 峰宽 [min] | 峰面积 mAU *s | 峰高 [mAU]  | 峰面积 %   |
|-----|------------|----|----------|------------|-----------|---------|
| 1   | 6.438      | VV | 0.1497   | 146.81892  | 15.11268  | 3.5020  |
| 2   | 6.786      | VB | 0.1726   | 4001.93457 | 354.20807 | 95.4564 |
| 3   | 8.997      | BB | 0.2415   | 43.66702   | 2.80290   | 1.0416  |

总量 : 4192.42052 372.12365

=====

11. Product **5e**(1) Racemic **5e**Retention times: 15.6, 31.0 (*exo* isomer) and 17.6, 36.1 (*endo* isomer) mins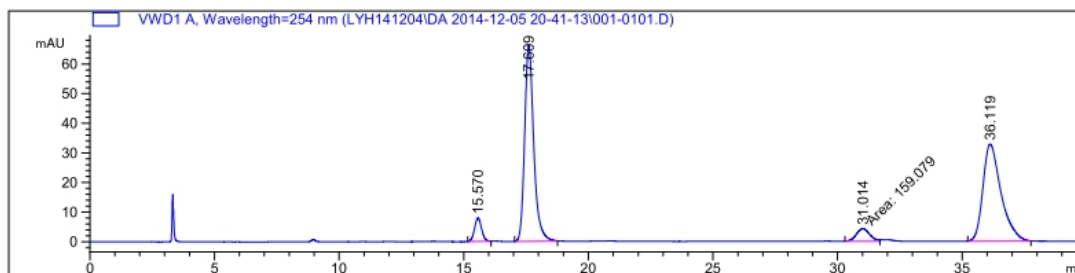

```

=====
                          Area Percent Report
=====

```

```

Sorted By      :      Signal
Multiplier:    :      1.0000
Dilution:      :      1.0000
Use Multiplier & Dilution Factor with ISTDs

```

```

Signal 1: VWD1 A, Wavelength=254 nm

```

| Peak # | RetTime [min] | Type | Width [min] | Area mAU*s | Height [mAU] | Area %  |
|--------|---------------|------|-------------|------------|--------------|---------|
| 1      | 15.570        | BB   | 0.3057      | 155.33134  | 7.88053      | 4.2542  |
| 2      | 17.609        | BB   | 0.3856      | 1678.83728 | 66.31950     | 45.9800 |
| 3      | 31.014        | MF   | 0.6245      | 159.07932  | 4.24561      | 4.3569  |
| 4      | 36.119        | BB   | 0.7537      | 1657.98242 | 32.83168     | 45.4089 |

```

Totals :                3651.23036  111.27731

```

```

=====
*** End of Report ***

```

(2) Product **5e** from the Diels-Alder reaction catalyzed by HT21-NH4-CuL1 (*endo* isomer:  
>99% *ee*)

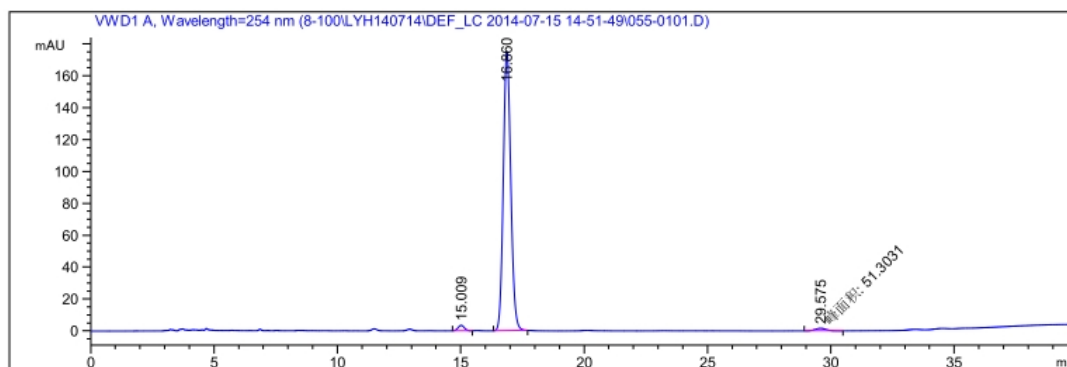

=====  
面积百分比报告  
=====

排序 : 信号  
乘积因子 : 1.0000  
稀释因子 : 1.0000  
内标使用乘积因子和稀释因子

信号 1: VWD1 A, Wavelength=254 nm

| 峰 # | 保留时间 [min] | 类型 | 峰宽 [min] | 峰面积 mAU *s | 峰高 [mAU]  | 峰面积 %   |
|-----|------------|----|----------|------------|-----------|---------|
| 1   | 15.009     | BB | 0.2716   | 60.61797   | 3.48141   | 1.5925  |
| 2   | 16.860     | BB | 0.3261   | 3694.54150 | 175.17296 | 97.0597 |
| 3   | 29.575     | MM | 0.5328   | 51.30312   | 1.60483   | 1.3478  |

总量 : 3806.46259 180.25921

=====

**References**

- 1 S. Otto, F. Bertocin and J. B. F. N. Engberts, *J. Am. Chem. Soc.*, 1996, **118**, 7702.
- 2 D. A. Evans, K. R. Fandrick and H.-J. Song, *J. Am. Chem. Soc.*, 2005, **127**, 8942.
- 3 M. C. Myers, A. R. Bharadwaj, B. C. Milgram and K. A. Scheidt, *J. Am. Chem. Soc.*, 2005, **127**, 14675.
- 4 G. Roelfes, A. J. Boersma and B. L. Feringa, *Chem. Commun.*, 2006, 635.
- 5 L. Wang, J. Zhang, N. Wang, X. Yang, Q. Wang and X. Yu, *Lett. Org. Chem.*, 2009, **6**, 392.
- 6 C. Wei, L. Ren and N. Gao, *Int. J. Biol. Macromol.*, 2013, **57**, 1.
- 7 H. Bertrand, D. Monchaud, A. De Cian, R. Guillot, J.-L. Mergny and M.-P. Teulade-Fichou, *Org. Biomol. Chem.*, 2007, **5**, 2555.
- 8 N. S. Oltra and G. Roelfes, *Chem. Commun.*, 2008, 6039.
- 9 C. H. Wang, G. Q. Jia, J. Zhou, Y. H. Li, Y. Liu, S. M. Lu and C. Li, *Angew. Chem. Int. Ed.*, 2012, **51**, 9352.
